# Ancestry-agnostic estimation of DNA sample contamination from sequence reads.

---

Fan Zhang<sup>1,2</sup> (fanzhang@umich.edu)

Matthew Flickinger<sup>1,3</sup> (mflick@umich.edu)

InPSYght Psychiatric Genetics Consortium

Gonçalo R. Abecasis<sup>1,3</sup> (goncalo@umich.edu)

Michael Boehnke<sup>1,3</sup> (boehnke@umich.edu)

Hyun Min Kang<sup>1,3\*</sup> (hmkang@umich.edu)

1. Center for Statistical Genetics, University of Michigan, Ann Arbor, MI
2. Department of Computational Medicine and Bioinformatics, University of Michigan Medical School, Ann Arbor, MI
3. Department of Biostatistics, School of Public Health, University of Michigan, Ann Arbor, MI

\*Correspondence to:

hmkang@umich.edu

## 1 Abstract

---

2 Detecting and estimating DNA sample contamination are important steps to ensure high quality  
3 genotype calls and reliable downstream analysis. Existing methods rely on population allele  
4 frequency information for accurate estimation of contamination rates. Correctly specifying  
5 population allele frequencies for each individual in early stage of sequence analysis is impractical or  
6 even impossible for large-scale sequencing centers that simultaneously process samples from  
7 multiple studies across diverse populations. On the other hand, incorrectly specified allele  
8 frequencies may result in substantial bias in estimated contamination rates. For example, we  
9 observed that existing methods often fail to identify 10% contaminated samples at a typical 3%  
10 contamination exclusion threshold when genetic ancestry is misspecified. Such an incomplete  
11 screening of contaminated samples substantially inflates the estimated rate of genotyping errors  
12 even in deeply sequenced genomes and exomes.

13 We propose a robust statistical method that accurately estimates DNA contamination and is  
14 agnostic to genetic ancestry of the intended or contaminating sample. Our method integrates the  
15 estimation of genetic ancestry and DNA contamination in a unified likelihood framework by  
16 leveraging individual-specific allele-frequencies projected from reference genotypes onto principal  
17 component coordinates. We demonstrate this method robustly and accurately estimates  
18 contamination rates across different populations and contamination rates. We further demonstrate  
19 that in the presence contamination, quantitative estimates of genetic ancestry (e.g. principal  
20 component coordinates) can be substantially biased if contamination is ignored, and that our  
21 proposed method corrects for this bias. Our method is publicly available at  
22 <http://github.com/Griffan/verifyBamID>

## 23 Introduction

---

24 Sample contamination is a common problem in DNA sequencing studies. Contamination may  
25 occur during sample shipment (due to spillage across wells, pipetting errors, insufficient dry ice),  
26 library preparation (due to gel cut-through in fragment size selection or unexpected switch  
27 between barcoded adaptors *in-vitro*), *in-silico* demultiplexing from a sequenced lane into barcoded  
28 samples, or on many other unexpected occasions. Even modest levels of contamination (e.g. 2-5%)  
29 within a species substantially increase genotyping error, even for deeply sequenced genomes<sup>1</sup>.  
30 Accurate estimation of DNA contamination rates allow us to identify and exclude contaminated  
31 samples from downstream analysis, and genotypes of moderately contaminated samples (e.g.  
32 <10%) can be improved by accounting for contamination in genotype calling<sup>1</sup>.

33 Previously we developed methods and a software tool, *verifyBamID*<sup>2</sup>, to estimate DNA  
34 contamination from sequence reads given known population allele frequencies of common  
35 variants. Many investigators and most major sequencing centers use *verifyBamID* as a part of their  
36 standard sequence processing pipeline. However, we have shown that *verifyBamID* can  
37 underestimate DNA contamination rates if the assumed population allele frequencies are  
38 inaccurate<sup>2</sup>. Such an underestimation can be avoided if correct population allele frequencies are  
39 provided in an ideal circumstances. However, in early stage of sequence analysis, performing a  
40 tailored customization of quality control (QC) steps for each sequenced genome based on their  
41 ancestry is not always feasible or or sometimes impossible. Such a tailored customization requires  
42 planned coordination between sequencing centers and study investigators prior to sequencing to  
43 share the self-reported ancestry (which is not always accurate) or estimated ancestry from external

44 genotypes (which is not always available). Modifying the QC pipeline to accommodate study-  
45 specific or sample-specific parameters may not be a possible option for large sequencing centers.  
46 Even if such a tailored customization of QC pipeline is possible, preparing per-sample ancestry prior  
47 to QC may delay time-sensitive issues in the sequencing procedure. If contamination rates can be  
48 accurately estimated without having to know the ancestry or allele frequencies a priori this will  
49 simplify the sequence analysis pipeline and expedite the QC.

50 Here we describe a novel method to robustly detect and estimate DNA contamination by  
51 modelling the probability of observed sequence reads as a function of “individual-specific allele  
52 frequencies” that account for genetic ancestry of a sample. Instead of assuming that the population  
53 allele frequencies are known, we represent individual-specific allele frequencies as a function of  
54 genetic ancestry using principal component coordinates and the reference genotypes from a  
55 diverse population, e.g. Human Genome Diversity Project (HGDP)<sup>3</sup> or 1000 Genomes<sup>4</sup>. We then  
56 jointly estimate genetic ancestry and contamination rates of a sequenced individual based on a  
57 mixture model, without requiring the assumption that population allele frequencies are known.

58 Our method enables accurate ancestry-agnostic estimation of contamination through a unified  
59 likelihood framework that incorporates genetic ancestry and contamination together. We show that  
60 our method provides (1) comparable or more accurate estimates of genetic ancestry than existing  
61 methods such as *TRACE/LASER*<sup>5,6</sup> even in the absence of contamination and (2) reduced bias in  
62 contamination rate estimates compared to our previous method requiring known population allele  
63 frequencies using *in silico* contaminated datasets and sequenced genomes from the InPSYght  
64 psychiatric genetics sequencing study.

## 65 Material and Methods

---

66 We aim to jointly estimate sample contamination rates and genetic ancestry from sequence  
67 reads without specifying population allele frequencies. First, we describe our previous mixture  
68 model to estimate contamination rates assuming population allele frequencies are known. Second,  
69 we introduce a model for sequence reads using population allele frequencies as a function of  
70 genetic ancestry represented in principal component coordinates. Third, we extend the model to  
71 enable joint estimation of contamination rates and genetic ancestry. Fourth, we evaluate our  
72 methods using *in silico* contaminated samples and whole genome sequence data from the InPSYght  
73 study.

### 74 Likelihood-based mixture model for DNA sequence contamination

---

75 In our previous contamination detection methods<sup>2</sup>, we assumed that the DNA sequence reads  
76 from an intended sample are contaminated by sequence reads from at most one contaminating  
77 sample from the same population, and that the population allele frequencies of all analyzed genetic  
78 variants are known. For each bi-allelic variant  $i$  ( $1 \leq i \leq m$ ), let  $b_{ij} \in \{R, A, O\}$  ( $1 \leq j \leq D_i$ ) be the  
79 observed base call representing the reference allele (R), alternate allele (A), or other allele (O) for  
80 the  $j$ -th read that overlaps the variant;  $D_i$  is the observed sequence depth at variant  $i$ . Let  $e_{ij} \in$   
81  $\{0,1\}$  be a random variable indicating whether a sequencing error did (1) or did not (0) occur for  
82 observed base  $b_{ij}$ ; we assume  $e_{ij}$  follows a Bernoulli distribution with success probability  $10^{-\frac{Q_{ij}}{10}}$   
83 where  $Q_{ij}$  is a phred-scale base quality score of  $b_{ij}$ . In the absence of contamination, if the true  
84 genotype  $g_i \in \{0,1,2\}$  represents the count of alternate alleles of the sequenced sample, then

85  $\Pr(b_{ij}|g_i^s, e_{ij})$  can be easily represented as in Table 1, making the simplifying assumption of equally  
86 likely errors across four possible nucleotides.

87 We assume that the observed sequence reads are a  $(1 - \alpha) : \alpha$  mixture of intended and  
88 contaminating reads given a contamination rate  $0 \leq \alpha \leq 1$ . Let  $g_i^1$  and  $g_i^2$  represent the true  
89 genotypes of the intended and contaminating samples at variant  $i$ , respectively. Then the mixture  
90 model likelihood of each observed base becomes

$$91 \quad \Pr(b_{ij}|g_i^1, g_i^2, e_{ij}; \alpha) = (1 - \alpha)\Pr(b_{ij}|g_i^1, e_{ij}) + \alpha\Pr(b_{ij}|g_i^2, e_{ij}) \quad (1)$$

92 Assuming a homogenous population with known population allele frequency  $f_i$  and Hardy-  
93 Weinberg Equilibrium (HWE),  $\Pr(g_i^2; f_i)$  follows a Binomial( $2, f_i$ ) distribution. Under the  
94 simplifying assumption of independent variants, the likelihood of the contamination rate becomes

$$95 \quad L(\alpha) = \prod_{i=1}^m \sum_{g_i^1} \sum_{g_i^2} \left\{ \prod_{j=1}^{D_i} \sum_{e_{ij}} \Pr(b_{ij}|g_i^1, g_i^2, e_{ij}; \alpha) \Pr(e_{ij}) \right\} \Pr(g_i^2; f_i) \Pr(g_i^1; f_i) \quad (2)$$

96 The maximum likelihood estimate (MLE) of contamination rate  $\hat{\alpha}$  can be obtained using Brent's  
97 algorithm<sup>7</sup>.

98 As we previously reported<sup>2</sup>, this model assumes correctly specified population allele frequencies  
99  $f_i$ .

## 100 Likelihood-based estimation of genetic ancestry (in the absence of contamination)

---

101 We extend this model to incorporate genetic ancestry. The key idea of this extension is to use  
102 the individual-specific allele frequency (ISAF)<sup>8,9</sup> to model the likelihood of the sequence reads.  
103 Several methods, including Spatial Ancestry Analysis (SPA)<sup>10</sup> and logistic factor analysis (LFA)<sup>9</sup>,

104 previously proposed modelling allele frequency as a function of genetic ancestry via principal  
105 component (PC) coordinates.

106 Let  $G$  be an  $m \times n$  genotype matrix (where  $g_{ij} = 0, 1,$  or  $2$  is the number of non-reference  
107 alleles at variant  $i$  in individual  $j$ ) of a genetically diverse reference panel of size  $n$ , such as 1000  
108 Genomes or HGDP. We define ISAF  $f_i$  ( $0 \leq f_i \leq 1$ ) for variant  $i$  as a weighted average of genotypes  
109 from the reference panel ( $f_i = \sum_{r=1}^n w_r G_{ir}$ ), where  $0 \leq w_r \leq 1$  and  $G_{ir} \in \{0,1,2\}$  for individual  $r$ .  
110 For a homogenous population,  $w_r = \frac{1}{2n}$  results in a *pooled allele frequency* across all individuals in  
111 the reference panel. If each individual can be categorically represented as a one of  $k$  mutually  
112 exclusive subpopulations, the *population-specific allele frequency* for the subpopulation  $s \in$   
113  $\{1,2, \dots, k\}$  can be represented as  $w_r = \frac{I(s_r=s)}{2n_s}$ , where  $s_r \in \{1,2, \dots, k\}$  represents the  
114 subpopulation that individual  $r$  belongs to, and  $n_s$  represents the size of subpopulation  $s$ . More  
115 generally, if individual's genetic ancestry is represented as continuous variables (such as PCs, SPAs,  
116 or LFAs), the individual-specific allele frequency (ISAF) can be represented as a function of the  
117 continuously represented genetic ancestry<sup>9,5</sup>.

118 The estimated ISAF can be viewed as (one half times the) genotype dosages approximated from  
119 a fixed number(= $K$ ) of factors, such as PCs, SPAs, or LFAs. In our method, we used a linear model to  
120 estimate ISAF from PCs, similar to previous studies<sup>8,9</sup>. Given the reference panel genotype matrix  $G$ ,  
121 let  $\frac{1}{2} \hat{G}$  be the *ISAF matrix* as a function of top  $K$  factors. ISAF matrix  $\frac{1}{2} \hat{G}$  should well approximate  
122  $\frac{1}{2} G$ . For example, under a linear model, typical principal component analysis takes the singular  
123 value decomposition (SVD) of the mean-centered genotype matrix  $\bar{G} = G - 2\mu\mathbf{1}_n^T = UDV^T$ , where  
124  $\mu = \frac{1}{2n} G\mathbf{1}_n$  is the pooled allele frequencies and  $\mathbf{1}_n$  is the column-vector of ones. Using the top  $K$

125 eigenvalues and corresponding eigenvectors  $U^{(K)}, D^{(K)}, V^{(K)}$  from the SVD, it is known that  $\hat{G} =$   
126  $\frac{1}{2} U^{(K)} D^{(K)} [V^{(K)}]^T + \boldsymbol{\mu} \mathbf{1}_n^T$  minimizes  $\|G - \hat{G}\|_2 = \sum_{i,j} (G_{ij} - \hat{G}_{ij})^2$  among all possible rank  $K$   
127 matrices<sup>11</sup>, making it a good proxy for the ISAF matrix.

128 For a new individual  $s$  with genetic ancestry represented as  $\mathbf{x}_s \in \mathbb{R}^k$  in the PC (eigenvector)  
129 space of the reference panel, the ISAF for  $i$ -th variant can be modelled as  $f_i(\mathbf{x}_s) = \frac{1}{2} \mathbf{u}_i^{(K)} D^{(K)} \mathbf{x}_s^T +$   
130  $\mu_i$ , where  $\mathbf{u}_i^{(K)}$  is  $i$ -th row of  $U^{(K)}$  and  $\mu_i$  is the  $i$ -th element of  $\boldsymbol{\mu}$ . To avoid boundary condition, we  
131 constrain  $\frac{\varepsilon}{2n} \leq f_i(\mathbf{x}_s) \leq 1 - \frac{\varepsilon}{2n}$  for a fixed  $\varepsilon$  (we used  $\varepsilon = 0.5$  in our experiments). Then the overall  
132 likelihood of an individual's genetic ancestry  $\mathbf{x}$  is

$$133 \quad L(\mathbf{x}_s) = \prod_{i=1}^m \sum_{g_i} \left\{ \prod_{j=1}^{D_i} \sum_{e_{ij}} \Pr(b_{ij} | g_i, e_{ij}) \Pr(e_{ij}) \right\} \Pr(g_i; f_i(\mathbf{x}_s)) \quad (3)$$

134 where  $g_i$  represents the unobserved genotype of the sequenced sample at variant  $i$ . The maximum-  
135 likelihood genetic ancestry coordinates can be estimated as  $\hat{\mathbf{x}}_s = \operatorname{argmax}_{\mathbf{x}_s \in \mathbb{R}^k} L(\mathbf{x}_s)$  using the  
136 Nelder-Mead<sup>12</sup> algorithm, starting with PC coordinates of a randomly selected individual from the  
137 reference panel. In our experiments, we always obtained consistent estimates of  $\hat{\mathbf{x}}_s$  regardless of  
138 start values.

### 139 Joint estimation of genetic ancestry and DNA contamination

---

140 Because our goal is to obtain unbiased estimates of the DNA contamination rate  $\alpha$  agonistic to  
141 genetic ancestry, we propose to jointly estimate  $\alpha$  and ancestry by combining the models described  
142 in the previous sections. Let  $\mathbf{x}_1, \mathbf{x}_2 \in \mathbb{R}^k$  be the genetic ancestries of the intended and  
143 contaminating samples. Then the likelihood under the combined model is



$$L(\alpha, \mathbf{x}_1, \mathbf{x}_2) = \prod_{i=1}^m \sum_{g_i^1} \sum_{g_i^2} \left\{ \prod_{j=1}^{D_i} \sum_{e_{ij}} \Pr(b_{ij} | g_i^1, g_i^2, e_{ij}; \alpha) \Pr(e_{ij}) \right\} \Pr(g_i^1; f_i(\mathbf{x}_1)) \Pr(g_i^2; f_i(\mathbf{x}_2))$$

145 When the contamination rate  $\alpha \approx 0$ , the parameters corresponding to  $\mathbf{x}_2$  do not contribute  
146 (much) to the likelihood and the estimates of  $\mathbf{x}_2$  may be unstable. To address this problem, we  
147 initially assume that the intended and contaminating samples are from the same population  $\mathbf{x}_1 =$   
148  $\mathbf{x}_2$  ('equal-ancestry' model) and then repeat the analysis allowing for  $\mathbf{x}_1 \neq \mathbf{x}_2$  ('unequal-ancestry'  
149 model). The dimension of parameter space for the unequal-ancestry model is  $2k + 1$ . We choose  
150 final parameter estimates between the two models based on Akaike Information Criterion (AIC)<sup>13</sup>.

#### 151 Evaluation on *in-silico* contaminated data based on 1000 Genomes project samples

---

152 We constructed *in-silico* contaminated DNA sequence reads using aligned low-coverage whole  
153 genome sequence reads from the 1000 Genomes phase 3 project<sup>4</sup>. We filtered out unmapped and  
154 mark-duplicated reads and then randomly sampled aligned sequence reads proportional to the  
155 intended contamination rates  $\alpha \in \{0.01, 0.02, 0.05, 0.1, 0.2\}$ . To match the mixing proportion of  
156 sequence reads originated from intended and contaminating to be  $(1 - \alpha) : \alpha$ , each read was  
157 sampled with probability  $(1 - \alpha)$  and  $\frac{B_1}{B_2} \alpha$  from each sample, where  $B_1$  and  $B_2$  are number of  
158 aligned bases from unique reads from intended and contaminating samples. We selected four  
159 populations, CHS (Han Chinese South), GBR (British in England and Scotland), MXL (Mexican  
160 Ancestry from Los Angeles USA), YRI (Yoruba in Ibadan, Nigeria), and arbitrarily selected 10 pairs of  
161 individuals with similar sequencing depths within the same population and across populations. To  
162 estimate genetic ancestry and/or contamination rate for these *in-silico* contaminated sequence  
163 reads, we used a reference panel of 938 HGDP<sup>3</sup> individuals across 1,000, 10,000 and 100,000

164 randomly chosen SNPs (pooled MAF > 0.5%), avoiding variants masked by the 1000 Genomes  
165 Project<sup>4</sup> (See Web Resource). When we compared estimated genetic ancestry with *LASER*, we used  
166 the same set of selected SNPs and sequence reads as input. For *TRACE*, we used genotypes from the  
167 phase 3 release (for 1000 Genomes) or an interim callset from the *GotCloud* software tool<sup>14</sup> (for  
168 InPSYght, see next section for details) on the same SNP set.

### 169 Experiment with real sequence data from the InPSYght study

---

170 Next, we applied our method to 500 deeply sequenced (mean depth 32x) genomes from the  
171 first two batches of the InPSYght study. For each sample, we evaluated the results from the six  
172 models: (1) the original *verifyBamID* using pooled allele frequencies; the original *verifyBamID* using  
173 (2) African, (3) East Asian, and (4) European allele frequencies; (5) the new *verifyBamID2* under the  
174 equal-ancestry model; and (6) *verifyBamID2* under the unequal-ancestry model. To calculate  
175 pooled, population-specific, and individual-specific allele frequencies, we used the 1000 Genomes  
176 phase 3 reference panel (n=2,504), randomly selecting 100,000 SNPs among the sites also  
177 polymorphic in Illumina Human Omni 2.5 array, with the same filtering criteria (MAF > 5% and 1000  
178 Genomes mask) as above.

179

## 180 Results

---

181 We assessed our new methods in the following steps. First, in the absence of contamination, we  
182 demonstrate that our estimation of genetic ancestry provides comparably accurate estimates of  
183 genetic ancestry as other state-of-art methods. Second, in the presence of contamination, we  
184 demonstrate that joint estimation of genetic ancestry and contamination substantially improves the  
185 estimation accuracy of both parameters. Third, using *in-silico* contaminated samples, we  
186 demonstrate that our methods robustly provide more accurate estimates than previous methods  
187 across various combinations of genetic ancestries and contamination rates. Fourth, from the  
188 analysis of deeply sequenced genomes in the InPSYght study, we demonstrate that our new  
189 methods deliver more accurate contamination estimates than the previous methods.

190

### 191 [New model-based methods accurately estimate genetic ancestry.](#)

---

192 In the absence of contamination, widely used methods such as *LASER* and *TRACE* are known to  
193 estimate genetic ancestry accurately. Because we propose using a new model-based approach to  
194 estimate the genetic ancestry (jointly with contamination rates), we first compared the accuracy of  
195 our new method, in the absence of contamination, with *LASER* and *TRACE*. We randomly chose 500  
196 ethnically diverse samples from the 1000 Genomes Project low-coverage (4X) genomes, and 500  
197 African American samples from the deeply sequenced (32x) genomes from the InPSYght project.  
198 We estimated their genetic ancestries using 100,000 SNPs from the HGDP reference panel (see  
199 Methods for details) and compared their genetic ancestry estimates obtained by *LASER* (using the  
200 same sequence data), and *TRACE* (using the hard-call genotypes). As illustrated in Figure 1A, 1C, 1E,

201 the estimated PC coordinates of the 1000 Genomes individuals are located close to their  
202 corresponding HGDP populations across all three methods. Compared to *TRACE* and *LASER*, we  
203 observed that the estimated genetic coordinates from *verifyBamID2* were the closest to the  
204 centroid of corresponding HGDP population (Table 2) in 4 of the 5 populations (all except TSI).  
205 These results suggest that our method provides estimates at least as precise compared to those for  
206 other state-of-the-art methods.

#### 207 [Genetic ancestry estimates may be confounded by DNA contamination.](#)

---

208 Next, we constructed *in-silico* contaminated sequenced data from the 1000 Genomes Project  
209 and estimated contamination parameters and genetic ancestries jointly. We observed that when  
210 sequences are contaminated between different continental populations, the genetic ancestry esti-  
211 mates in PC coordinates drift towards the contaminating population when contamination is ignored  
212 (Figure 2A) or when assuming that intended and contaminating samples originated from the same  
213 population (Figure 2B). As the contamination rate increases, drift increases.

214 However, when we accounted for possible differences in genetic ancestries between the two  
215 intended and contaminating samples using our new methods, PC coordinates remained similar to  
216 those for uncontaminated samples (Figure 2E), and contaminated samples constructed from indi-  
217 viduals that belong to the same population (Figure 2B, 2D, 2F).

#### 218 [Robust, accurate, ancestry-agnostic estimation of DNA contamination.](#)

---

219 Next, we evaluated the effect of genetic ancestry misspecification in estimating DNA  
220 contamination rates. We constructed contaminated samples between various combinations of

221 populations, and compared the accuracy of estimated contamination rates using both the original  
222 methods which assume known allele frequencies and the new methods which estimate  
223 contamination rate and genetic ancestry jointly.

224 When contamination happens within the same population, running original methods with  
225 correct continental population allele frequencies specified provided accurate contamination  
226 estimates (Figure 3A, 3E, 3I). However, using pooled allele frequencies, which would be a default  
227 option when it is infeasible to specify population information *a priori* before sequencing,  
228 consistently underestimated contamination rates. Bias was particularly large when intended individ-  
229 uals were of African ancestry.

230 Specifying incorrect population allele frequencies results in even larger contamination  
231 estimation bias. For example, using African allele frequencies on East Asian samples resulted in an  
232 average estimate of 2.9% contamination for samples with contamination 10% (Table S1), implying  
233 that a large fraction of 10% contaminated samples within East Asian ancestry would not have been  
234 flagged for contamination-based exclusion at the contamination-exclusion threshold of 1-3% used  
235 by many studies e.g. the Trans-Omics Precision Medicine (TOPMed) study<sup>15</sup>.

236 Our results consistently demonstrated that the ancestry-agnostic method provides as accurate  
237 estimates as the original methods specified with correct population labels (Figure 3A, 3E, 3I, Table  
238 S1), and the estimates are substantially better than those from pooled allele frequencies or  
239 incorrectly specified allele frequencies.

240 When the intended and contaminating populations are different, we observed that  
241 contamination is sometimes overestimated due to increased fraction of heterozygous genotypes

242 than expected by a given contamination rate under single population model. Our method based on  
243 unequal-ancestry model outperforms all the other methods in terms of overall bias and Mean  
244 Squared Error(MSE) (Figure 3, Table S4), correcting for both upward and downward biases in  
245 various ancestry combinations. For example, the relative deviation of estimated to intended  
246 contamination rate (i.e.  $|\hat{\alpha}/\alpha - 1|$ ) is reduced by 80% (73-88%) compared to the original  
247 *verifyBamID* with various population allele frequencies, suggesting reduced bias. MSE is also  
248 reduced by 92% (86-97%). This robustness reflects the ability to incorporate differences in  
249 population allele frequencies between intended and contaminating individuals (Figure 3B, 3C, 3D,  
250 3F, 3G, 3H, Table S1).

251 We also examined the accuracy of our methods for admixed populations by performing a similar  
252 experiment using the Mexican population (MXL) and obtained consistent results (Supplementary  
253 Table S2).

#### 254 [Results with deep whole genome sequence data from the InPSYght study.](#)

---

255 Next, we applied our methods to 500 African American samples from the InPSYght study (see  
256 Methods). Consistent with the results from our *in silico* contamination studies, we observed that  
257 the average contamination rate was 1.1-fold higher with newer method (0.36% for unequal-  
258 ancestry, 0.37% for equal-ancestry) compared to the original method with pooled allele frequency  
259 (0.33%) (Figure 4). The number of samples with estimated contamination rate >1% increased from  
260 16 (original method with pooled allele frequency) to 21 (unequal-ancestry method) or 23 (unequal-  
261 ancestry method), suggesting our new method more rigorously screens for contaminated samples.

262 All 500 deeply sequenced genomes in InPSYght study are reported to be African Americans, and  
263 indeed the estimated PC coordinates for all 500 individuals under all three methods lie between  
264 European and African samples. Compared to other methods to estimate genetic ancestry, our  
265 estimates resulted in tighter clustering along the European-African segment than *LASER*, and  
266 similarly tight clustering to *TRACE* (Figure 1B, 1D, 1F). For example, the correlation coefficient  
267 between the PC1 and PC2 coordinates were 0.927 for *LASER*, 0.981 for *TRACE*, and 0.985 for  
268 *verifyBamID2*, corroborating that *verifyBamID2* results in more precise estimate of African ancestry  
269 along the European-African segment in PC coordinates.

#### 270 [Impact of number of markers on accuracy, computational cost, and memory requirements.](#)

---

271 As we have shown previously<sup>2</sup>, there are trade-offs between computation cost and accuracy of  
272 contamination estimates. Using as many as 100,000 variants results in accurately estimated intended  
273 contamination rate. For example, MSE of relative deviation (i.e.  $|\hat{\alpha}/\alpha - 1|$ ) was 0.02, 0.01, 0.01 when  
274 the intended contamination was 1%, 2%, and 5%, respectively. When we use 10,000 variants, the  
275 MSEs modestly increased to 0.11, 0.04, and 0.01, respectively. When we use only 1,000 variants,  
276 MSEs further increased to 0.69, 0.25, 0.11, suggesting that the estimates may not be precise for low  
277 contamination rate when using only 1,000 variants. (Supplementary Table S3).

278 We also evaluated the computational cost and memory consumption of *verifyBamID2* on whole  
279 genome sequence data with various coverages. For the BAM files from the 1000 Genomes whole  
280 genome sequence data (4.3-5.1x coverage), the average wall-clock running time was 5.5 minutes with  
281 a single thread and peak memory consumption was 505 MB when using 10,000 markers in a server  
282 with Xeon 2.27GHz processor. When using 100,000 markers, the average wall-clock running time was

283 20.5 minutes with a single thread and 8.0 minutes with four threads, and peak memory consumption  
284 was 528 MB.

285 For deep genome data from the InPSYght study (31x coverage) stored in CRAM format, the  
286 average wall-clock time was 17.3 minutes and peak memory consumption was 514 MB when using  
287 10,000 markers. For 100,000 markers the average wall-clock time was 155.6 minutes (single thread)  
288 or 96 minutes (four threads) and peak memory consumption was 548 MB.



## 289 Discussion

---

290 Contamination detection is an essential step in the sequence analysis process that has important  
291 effects on following downstream analyses. Early and accurate estimation of DNA contamination can  
292 prevent wasted effort, time, and money by identifying the problems early on before too many  
293 samples are sequenced using contamination-prone protocols. Our previous method enabled such a  
294 timely contamination detection from sequence data and population allele frequencies at known  
295 variant sites, without requiring independent SNP genotype data. Our new method maintains these  
296 advantages, and in addition provide three more. First, because our joint analysis method is agnostic  
297 to genetic ancestry, it eliminates sample-to-sample variation in the parameter settings for the  
298 contamination checking procedure, simplifying the sequence analysis pipeline. Second, it provides  
299 more robust contamination estimates against potentially misspecified population allele frequency of  
300 the intended (or contaminating) samples when relying on the reported ancestry information. Third,  
301 it provides accurate estimates of genetic ancestries for both intended and contaminating samples.  
302 This enables additional sanity checking of the sequence data, such as determining whether a  
303 sequenced sample matches its expected (participant-reported) ancestry. It also facilitates  
304 incorporating ancestry information in the variant calling and downstream analysis, and allows us to  
305 track the source of contamination more precisely when contamination occurs.

306 Our method can be used not only to detect and estimate contamination, but also to estimate  
307 genetic ancestry from sequence data. Relatively few methods, such as *LASER*<sup>5,6</sup> and *bammds*<sup>16</sup>, exist  
308 for estimating genetic ancestry from sequence data while several methods have been developed for  
309 array-based genotypes, such as *EIGENSOFT*<sup>17</sup>, *FRAPPE*<sup>18</sup>, *ADMIXTURE*<sup>19</sup>, and *TRACE*<sup>6</sup>. We have

310 demonstrated that our method provides ancestry estimates as or more accurate than *LASER*,  
311 particularly when the sequenced samples are contaminated between different ancestries.

312 By jointly estimating genetic ancestry and contamination, we are able to accurately estimate  
313 contamination without requiring ancestry information *a priori*. Since obtaining population allele  
314 frequency information may be infeasible or even impossible at the time of sequencing, it is important  
315 to highlight that our ancestry-agnostic approach provides more timely and accurate feedback to the  
316 sequencing facilities. Our ancestry-agnostic approach also simplifies the sequence analysis pipeline,  
317 because the same input arguments can be applied across all samples regardless of their genetic  
318 ancestry

319 The key idea of using individual-specific allele frequencies (ISAF) to account for population  
320 structure in genetic analysis has been suggested previously in the context of characterizing  
321 population structure or identifying highly differentiated variants across populations<sup>8,9</sup>. To the best  
322 of our knowledge, our method describes the first likelihood-based model utilizing ISAF to represent high  
323 throughput sequence reads under population structure and/or contamination. While previous  
324 studies proposed logistic models as alternative to linear model<sup>8,9</sup>, we used linear models (bounded  
325 by minimum and maximum value) between allele frequencies and population structure represented  
326 by Singular Value Decomposition (SVD) on the genotype matrix. We made this choice because the  
327 logistic model is computationally more intensive, and the linear model is accurate for the common  
328 variants we use, as demonstrated by the previous studies<sup>9</sup>.

329 Because we use Nelder-Mead optimization for maximum likelihood estimation, it is possible that  
330 the estimates do not converge to the global maximum, especially when many principal components  
331 are used. We observed that estimating the full unequal-ancestry model parameters sometimes does

332 fail to converge especially when there is little or no contamination, due to the limited identifiability  
333 of the genetic ancestry of contaminating samples in this situation. Starting by estimating  
334 contamination rate and shared genetic ancestry parameters using the equal-ancestry model, and  
335 using those estimates as start values for the unequal-ancestry model to allow different ancestries  
336 between the intended and contaminating samples dramatically improved convergence; in fact, the  
337 method converged to consistent estimates across multiple starting points within 1,000 iterations in  
338 all our benchmark cases, in both real and *in-silico* contaminated data. When the contamination rate  
339 is extremely small (e.g. <0.1%), estimation of genetic ancestry of contaminating samples can still be  
340 challenging. We allow unequal ancestries between intended and contaminating samples only when  
341 the likelihood substantially improves beyond AIC threshold between equal ancestry and unequal  
342 ancestry models. This procedure effectively removed all outlier estimates of genetic ancestries of  
343 contaminating samples in our experiments.

344       There are other possible useful extensions to our joint contamination and estimation method.  
345 We are extending these methods to detect and estimate contamination for RNA-seq and other  
346 epigenomic sequence data. The same model has potential applications in other areas, such as cancer  
347 single cell transcriptomics<sup>20</sup>.

348       We expect that our new *verifyBamID2* software will facilitate more accurate, convenient, and  
349 timely quality control of sequence genomes. Our software tool is publicly available at  
350 <http://github.com/Griffan/verifyBamID>. Our GitHub repository provides reference files that can be  
351 used as test input for our methods. These files contain key input files required for *verifyBamID2*,  
352 including variant loadings, supporting various genome builds (GRCh37 and GRCh38), and various  
353 numbers of variants.

## 354 **Web Resources**

---

355 1000 genomes project genome mask file:

356 ([ftp://ftp.1000genomes.ebi.ac.uk/vol1/ftp/release/20130502/supporting/accessible\\_genome\\_mask](ftp://ftp.1000genomes.ebi.ac.uk/vol1/ftp/release/20130502/supporting/accessible_genome_mask)  
357 [s/StrictMask/](ftp://ftp.1000genomes.ebi.ac.uk/vol1/ftp/release/20130502/supporting/accessible_genome_mask))

358

## 359 **Acknowledgements**

---

360 This work was supported by NIH grants HG009976 (to M.F. and M.B.), HL137182 (to H.M.K. and F.Z),  
361 HG007022 (to G.R.A), MH105653 (to M.B, InPSYght Consortium, and H.M.K.)

362

## 363 **References**

---

364 1. Flickinger, M., Jun, G., Abecasis, G.R., Boehnke, M., and Kang, H.M. (2015). Correcting for sample  
365 contamination in genotype calling of DNA sequence data. *Am. J. Hum. Genet.* *97*, 284–290.

366 2. Jun, G., Flickinger, M., Hetrick, K.N., Romm, J.M., Doheny, K.F., Abecasis, R., Boehnke, M., and  
367 Kang, H.M. (2012). Detecting and estimating contamination of human DNA samples in sequencing  
368 and array-based genotype data. 839–848.

369 3. Cavalli-Sforza, L.L. (2005). The Human Genome Diversity Project: past, present and future. *Nat*  
370 *Rev Genet* *6*, 333–340.

371 4. The 1000 Genomes Project Consortium (2015). A global reference for human genetic variation.  
372 *Nature* *526*, 68–74.

- 373 5. Wang, C., Zhan, X., Bragg-Gresham, J., Kang, H.M., Stambolian, D., Chew, E.Y., Branham, K.E.,  
374 Heckenlively, J., Fulton, R., Wilson, R.K., et al. (2014). Ancestry estimation and control of  
375 population stratification for sequence-based association studies. *Nat. Genet.* *46*, 409–415.
- 376 6. Wang, C., Zhan, X., Liang, L., Abecasis, G.R., and Lin, X. (2015). Improved ancestry estimation for  
377 both genotyping and sequencing data using projection procrustes analysis and genotype  
378 Imputation. *Am. J. Hum. Genet.* *96*, 926–937.
- 379 7. Brent, R.P. (1974). Algorithms for minimization without derivatives. *IEEE Trans. Automat. Contr.*
- 380 8. Conomos, M.P., Reiner, A.P., Weir, B.S., and Thornton, T.A. (2016). Model-free estimation of  
381 recent genetic relatedness. *Am. J. Hum. Genet.* *98*, 127–148.
- 382 9. Hao, W., Song, M., and Storey, J.D. (2015). Probabilistic models of genetic variation in structured  
383 populations applied to global human studies. *Bioinformatics* *32*, 713–721.
- 384 10. Yang, W.W.-Y., Novembre, J., Eskin, E., and Halperin, E. (2012). A model-based approach for  
385 analysis of spatial structure in genetic data. *Nat. Genet.* *44*, 725–731.
- 386 11. Pearson, K. (1901). LIII. *On lines and planes of closest fit to systems of points in space*. *Philos.*  
387 *Mag. Ser. 6* 2, 559–572.
- 388 12. Nelder, J.A., and Mead, R. (1965). A simplex method for function minimization. *Comput. J.* *7*,  
389 308–313.
- 390 13. Akaike, H. (1974). A new look at the statistical model identification. *IEEE Trans. Automat. Contr.*
- 391 14. Jun, G., Wing, M.K., Abecasis, G.R., and Kang, H.M. (2015). An efficient and scalable analysis  
392 framework for variant extraction and refinement from population-scale DNA sequence data.

393 Genome Res. 25, 918–925.

394 15. Natarajan, P., Peloso, G.M., Zekavat, S.M., Montasser, M., Ganna, A., Chaffin, M., Khera, A. V.,  
395 Zhou, W., Bloom, J.M., Engreitz, J.M., et al. (2018). Deep-coverage whole genome sequences and  
396 blood lipids among 16,324 individuals. Nat. Commun.

397 16. Malaspinas, A.S., Tange, O., Moreno-Mayar, J.V., Rasmussen, M., DeGiorgio, M., Wang, Y.,  
398 Valdiosera, C.E., Politis, G., Willerslev, E., and Nielsen, R. (2014). bammds: a tool for assessing the  
399 ancestry of low-depth whole-genome data using multidimensional scaling (MDS). Bioinformatics  
400 30, 2962–2964.

401 17. Price, A.L., Patterson, N.J., Plenge, R.M., Weinblatt, M.E., Shadick, N. a, and Reich, D. (2006).  
402 Principal components analysis corrects for stratification in genome-wide association studies. Nat.  
403 Genet. 38, 904–909.

404 18. Tang, H., Peng, J., Wang, P., and Risch, N.J. (2005). Estimation of individual admixture: Analytical  
405 and study design considerations. Genet. Epidemiol. 28, 289–301.

406 19. Alexander, D.H., Novembre, J., and Lange, K. (2009). Fast model-based estimation of ancestry in  
407 unrelated individuals. Genome Res. 19, 1655–1664.

408 20. Kang, H.M., Subramaniam, M., Targ, S., Nguyen, M., Maliskova, L., McCarthy, E., Wan, E., Wong,  
409 S., Byrnes, L., Lanata, C.M., et al. (2018). Multiplexed droplet single-cell RNA-sequencing using  
410 natural genetic variation. Nat. Biotechnol.

411

412

413

**Table 1.** Conditional probability  $P(b_{ij} | g_i, e_{ij})$  of read  $b_{ij}$  given true genotype  $g_i$  and the variable representing the event of base calling error  $e_{ij}$ , as described in (Jun et al 2012<sup>2</sup>)

| True Genotype $g_i$ | Base Calling Error Event $e_{ij}$ | $\Pr(b_{ij} = R)$ | $\Pr(b_{ij} = A)$ | $\Pr(b_{ij} = O)^b$ |
|---------------------|-----------------------------------|-------------------|-------------------|---------------------|
| $g_i = RR^a$        | $e_{ij} = 0$                      | 1                 | 0                 | 0                   |
|                     | $e_{ij} = 1$                      | 0                 | 1/3               | 2/3                 |
| $g_i = RA^a$        | $e_{ij} = 0$                      | 1/2               | 1/2               | 0                   |
|                     | $e_{ij} = 1$                      | 1/6               | 1/6               | 2/3                 |
| $g_i = AA^a$        | $e_{ij} = 0$                      | 0                 | 1                 | 0                   |
|                     | $e_{ij} = 1$                      | 1/3               | 0                 | 2/3                 |

<sup>a</sup> RR, RA, AA: homozygous reference, heterozygous, and homozygous non-reference genotypes

<sup>b</sup> O: alleles other than R or A; assumes four possible alleles (bases)

414

**Table 2.** Distance between estimated PCA coordinates of HGDP and 1000G populations\*

| Population Label |            | <i>TRACE</i> | <i>LASER</i> | <i>verifyBamID2</i> |
|------------------|------------|--------------|--------------|---------------------|
| 1000G            | HGDP       |              |              |                     |
| CHB              | Han-NChina | 1.68         | 2.61         | <b>0.40</b>         |
| CHS              | Han        | 1.70         | 1.24         | <b>1.18</b>         |
| TSI              | Tuscan     | <b>1.52</b>  | 2.16         | 1.81                |
| YRI              | Yoruba     | 2.32         | 1.73         | <b>0.42</b>         |
| JPT              | Japanese   | 1.54         | <b>1.03</b>  | 1.22                |

\*Distances were measured between the mean PCA coordinates across the population in HGDP (estimated from the array data of Wang et al.<sup>6</sup>) and the mean PCA coordinates estimated from 1000 Genomes low coverage sequence data of the corresponding population, projected onto the same PCA coordinates using *TRACE*, *LASER*, or *verifyBamID2* (assuming no contamination). Bold face represents the smallest distance among the three methods for each population.



**Table 3.** Average contamination estimates for 5% contaminated samples (size n=10).

| Sample Population |               | Original Model (Fixed Allele Frequencies) |            |              |        | Equal-Ancestry Model | Unequal-Ancestry Model |
|-------------------|---------------|-------------------------------------------|------------|--------------|--------|----------------------|------------------------|
| Intended          | Contaminating | European                                  | East Asian | African      | Pooled |                      |                        |
| GBR               | GBR           | <b>4.73%</b>                              | 3.19%      | 2.67%        | 3.76%  | 4.63%                | 4.63%                  |
| CHS               | CHS           | 1.90%                                     | 4.73%      | 1.25%        | 2.38%  | 4.73%                | <b>4.76%</b>           |
| YRI               | YRI           | 1.78%                                     | 1.58%      | <b>4.44%</b> | 2.45%  | 4.40%                | 4.40%                  |
| CHS               | YRI           | 3.33%                                     | 6.91%      | 2.27%        | 4.10%  | 6.71%                | <b>4.81%</b>           |
| YRI               | CHS           | 2.79%                                     | 2.55%      | 6.29%        | 3.76%  | 5.99%                | <b>4.67%</b>           |
| GBR               | YRI           | 6.13%                                     | 4.16%      | 3.60%        | 5.04%  | 5.90%                | <b>4.83%</b>           |
| YRI               | GBR           | 2.81%                                     | 2.57%      | 6.38%        | 3.80%  | 6.01%                | <b>4.63%</b>           |
| CHS               | GBR           | 2.87%                                     | 6.33%      | 1.98%        | 3.55%  | 6.13%                | <b>4.83%</b>           |
| GBR               | CHS           | 5.32%                                     | 3.78%      | 3.05%        | 4.32%  | <b>5.16%</b>         | 4.67%                  |

416 Average contamination estimates of *in-silico* contaminated samples when the true contamination  
417 rate is 5%. Each mixing configuration (e.g. GBR+CHS) contains 10 samples that are constructed with  
418 95% reads coming from the intended sample and 5% reads from the contaminating sample. The  
419 estimated contamination rates are obtained using the original version *verifyBamID* by specifying  
420 prior allele frequencies as European, East Asian, African, and Pooled, respectively. Bold represents  
421 the closest estimate to the true value of 5%.

## 422 Figure Legends

---

423

424 Figure 1.

425 Evaluation of estimated genetic ancestry coordinates, in the absence of contamination, between  
426 *TRACE*, *LASER*, and *verifyBamID2* on samples from the 1000 Genomes low coverage genome (n=500,  
427 diverse ancestry) sequence data (A,C,E) and from the InPSYght deep genome (n=500, African  
428 Americans) sequence data (B,D,F). Panels A and B show results from *TRACE*, C and D from *LASER*, and  
429 E and F from *verifyBamID2* (assuming no contamination). Each point represents a sample and each  
430 color represents a population ancestry with the exception that grey point represents PCA coordinates  
431 of reference (HGDP) samples.

432

433 Figure 2.

434 Impact of DNA sample contamination on the estimation of genetic ancestry. Each point represents a  
435 sample. Each grey point represents reference (HGDP) sample and its PCA coordinates, similar to  
436 Figure 1. Each colored point represents *in-silico* contaminated samples across various  
437 contamination rates and populations. In panels A, C, and E, European (GBR) and East Asian (CHS)  
438 samples are contaminated with African (YRI) samples at different contamination rates (i.e.  
439 between-ancestry contamination). In panel B, D, and F, European (GBR) and East Asian (CHS)  
440 samples are contamination with another sample in the same population (i.e. within-ancestry  
441 contamination). Different colors represent different contamination rates ranging from 1% to 20%.  
442 Upper panels (A, B) show *verifyBamID2* estimates without modelling contamination, middle panels  
443 (C, D) *verifyBamID2* estimates under the assumption that intended and contaminating populations  
444 are identical (i.e. equal-ancestry model), lower panels (E, F) *verifyBamID2* estimates under the  
445 assumption that intended and contaminating populations can be different (i.e. unequal-ancestry  
446 model).

447

448 Figure 3.

449 Comparison of different models to estimate contamination rates. Horizontal (x) axis shows intended  
450 contamination rate, vertical (y) axis shows the ratio of estimated to intended contamination rates.  
451 Each color represents different models to estimate contamination rates. EUR\_AF, EAS\_AF, and  
452 AFR\_AF represent original *verifyBamID* using European, East Asian, and African allele frequencies  
453 across the continental population using the 1000 Genomes data. Pooled\_AF represents the original  
454 *verifyBamID* using aggregated allele frequencies across all 2,504 individuals in the 1000 Genomes  
455 Project. Equal\_Ancestry represents the *verifyBamID2* assuming that intended and contaminating  
456 samples belong to the same population. Unequal\_Ancestry represents *verifyBamID2* allowing  
457 different genetic ancestry between intended and contaminating sample (recommended setting).

458 Each panel represents different combinations of intended (row) and contaminating (column)  
459 populations, in the order of GBR, CHS, and YRI.

460

461 Figure 4

462 Comparison of contamination estimation between using *verifyBamID* and *verifyBamID2* on 500  
463 InPSYght samples. All subjects are African Americans. Each dot represents the pair of contamination  
464 rate estimates using different methods. The left panel shows the estimated contamination rates of  
465 the original *verifyBamID* with pooled allele frequencies, which is the default setting of *verifyBamID* in  
466 x-axis. Y-axis shows *verifyBamID2* with unequal-ancestry model (y-axis). Each point represents a  
467 sequenced subject. The right panel compares the estimated contamination rates between two  
468 models (unequal-ancestry vs. equal-ancestry) of *verifyBamID2* on the same dataset.

469

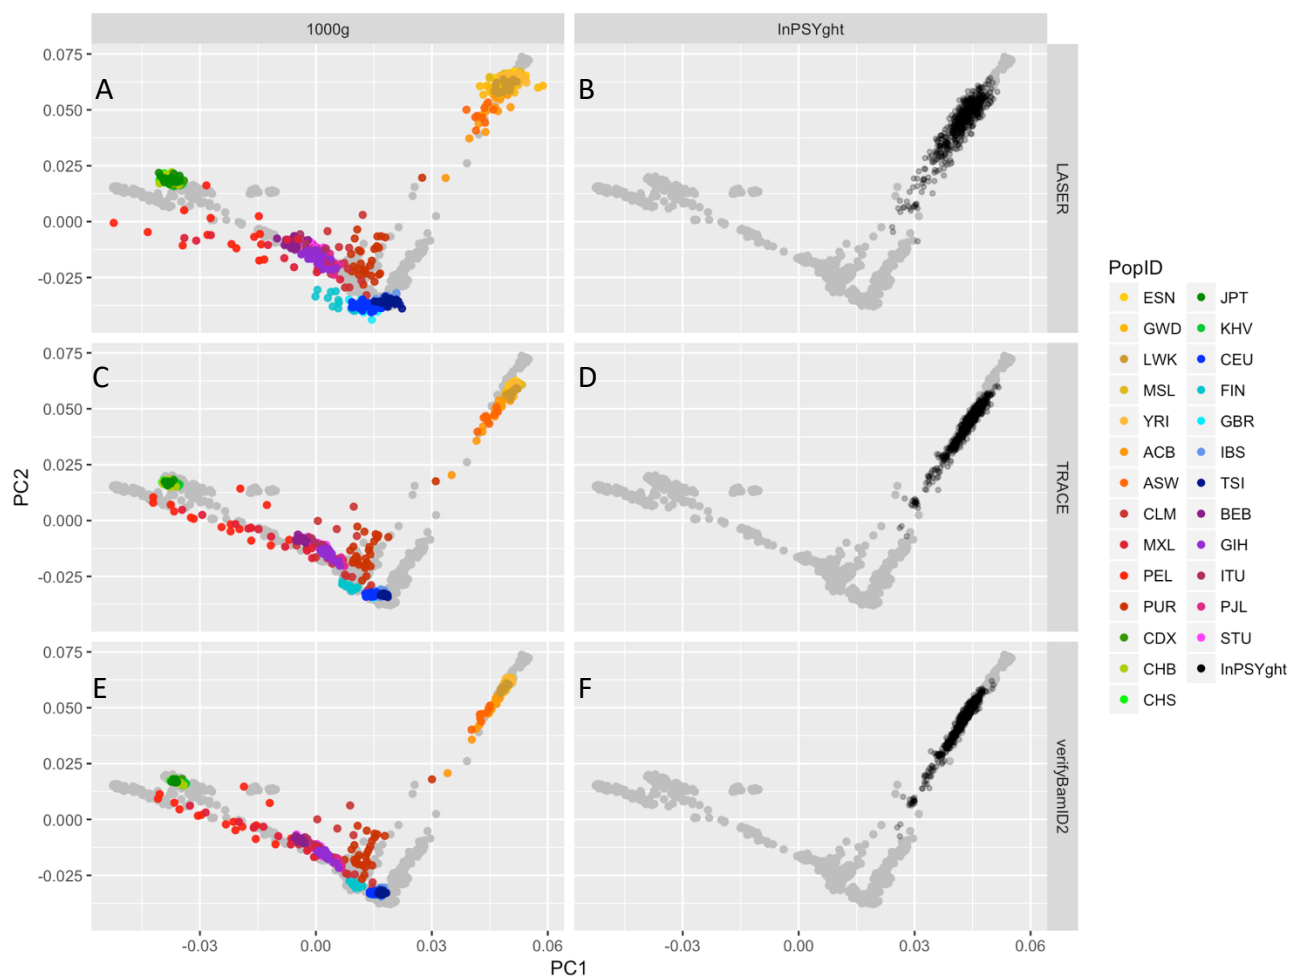

470 Figure 1.

471 Evaluation of estimated genetic ancestry coordinates, in the absence of contamination, between  
 472 *TRACE*, *LASER*, and *verifyBamID2* on samples from the 1000 Genomes low coverage genome (n=500,  
 473 diverse ancestry) sequence data (A,C,E) and from the InPSYght deep genome (n=500, African  
 474 Americans) sequence data (B,D,F). Panel A and B show results from *TRACE*, C and D from *LASER*, and  
 475 E and F from *verifyBamID2* (assuming no contamination). Each point represents a sample, each color  
 476 represents a population ancestry with the exception that grey point represents PCA coordinates of  
 477 reference (HGDP) samples.  
 478

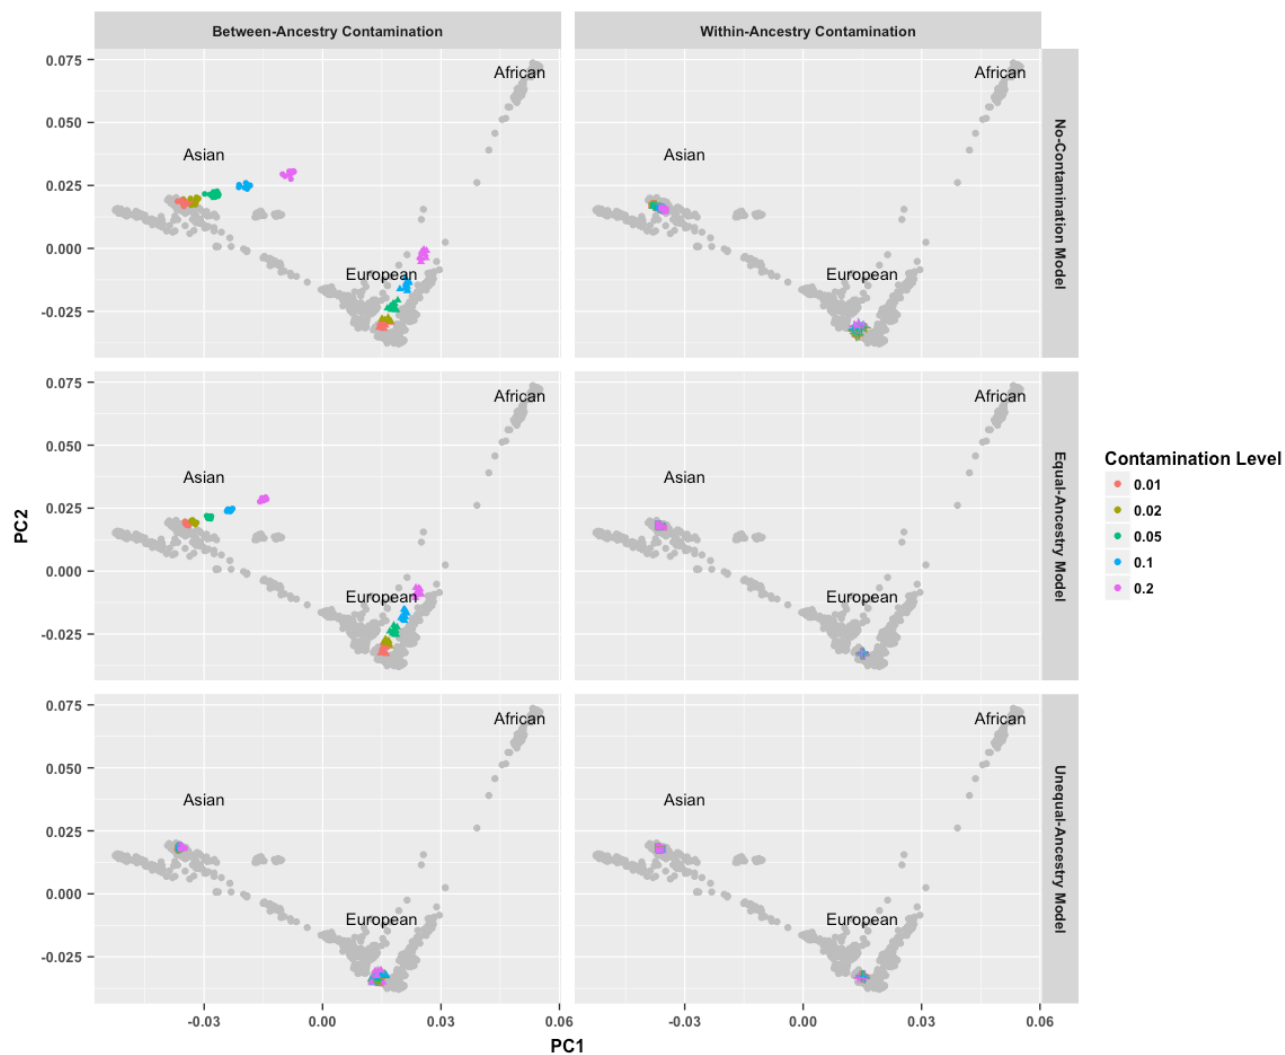

479

480 Figure 2.

481 Impact of DNA sample contamination on the estimation of genetic ancestry. Each point represents a  
482 sample. Grey point represents reference (HGDP) sample and its PCA coordinates, similar to Figure 1.  
483 Each colored point represents *in-silico* contaminated samples across various contamination rates and  
484 populations. In panel A, C, E, European (GBR) and East Asian (CHS) samples are contaminated with  
485 African (YRI) samples at different contamination rates (i.e. between-ancestry contamination). In  
486 panel B, D, F, European (GBR) and East Asian (CHS) samples are contamination with another sample  
487 in the same population (i.e. within-ancestry contamination). Different colors represent different  
488 contamination rate ranging from 1% to 20%. Upper panels (A, B) show *verifyBamID2* estimates  
489 without modelling contamination. Middle panels (C, D) show *verifyBamID2* estimates under the  
490 assumption that intended and contaminating populations are identical (i.e. equal-ancestry model).  
491 Lower panels (E, F) show *verifyBamID2* estimates under the assumption that intended and  
492 contaminating populations can be different (i.e. unequal-ancestry model).  
493

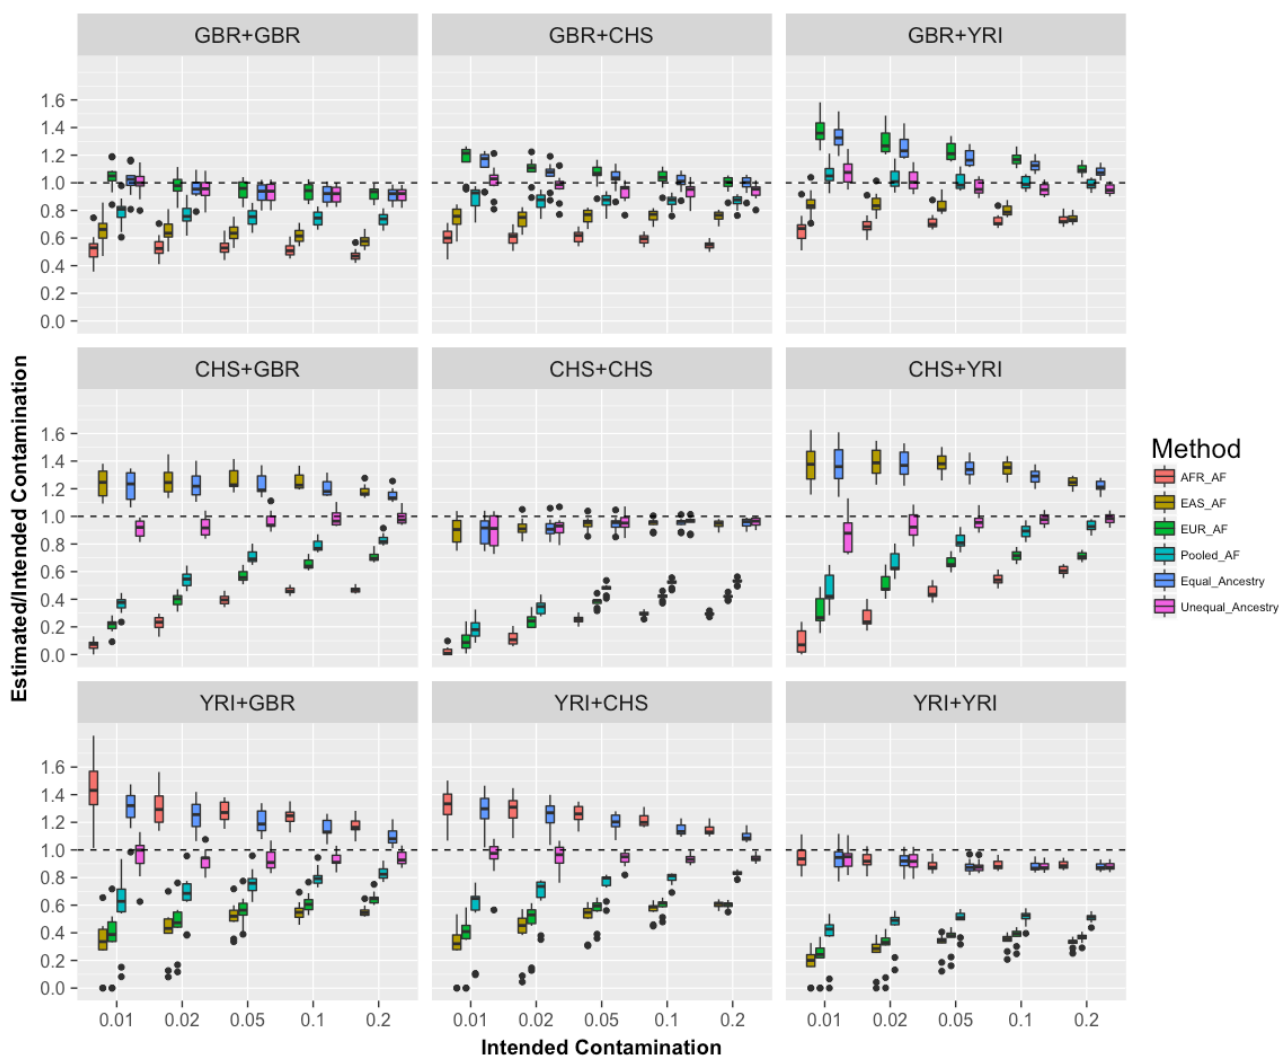

494

495

496 Figure 3.

497 Comparison of different models to estimate contamination rates. Horizontal (x) axis shows intended  
 498 Contamination rate, vertical (y) axis shows the ratio of estimated to intended contamination rates.  
 499 Each color represents different models to estimate contamination rates. EUR\_AF, EAS\_AF, AFR\_AF  
 500 represents old *verifyBamID* using European, East Asian, and African allele frequencies across the  
 501 continental population using the 1000 Genomes data. Pooled\_AF represents the old *verifyBamID*  
 502 using aggregated allele frequencies across all 2,504 individuals in the 1000 Genomes Project.  
 503 “Equal\_Ancestry” represents the *verifyBamID2* assuming that intended and contaminating samples  
 504 belong to the same population. “Unequal\_Ancestry” represents *verifyBamID2* allowing different  
 505 genetic ancestries between intended and contaminating samples (recommended setting). Each panel  
 506 represents different combinations of intended (row) and contaminating (column) populations, in the  
 507 order of GBR, CHS, and YRI.

508

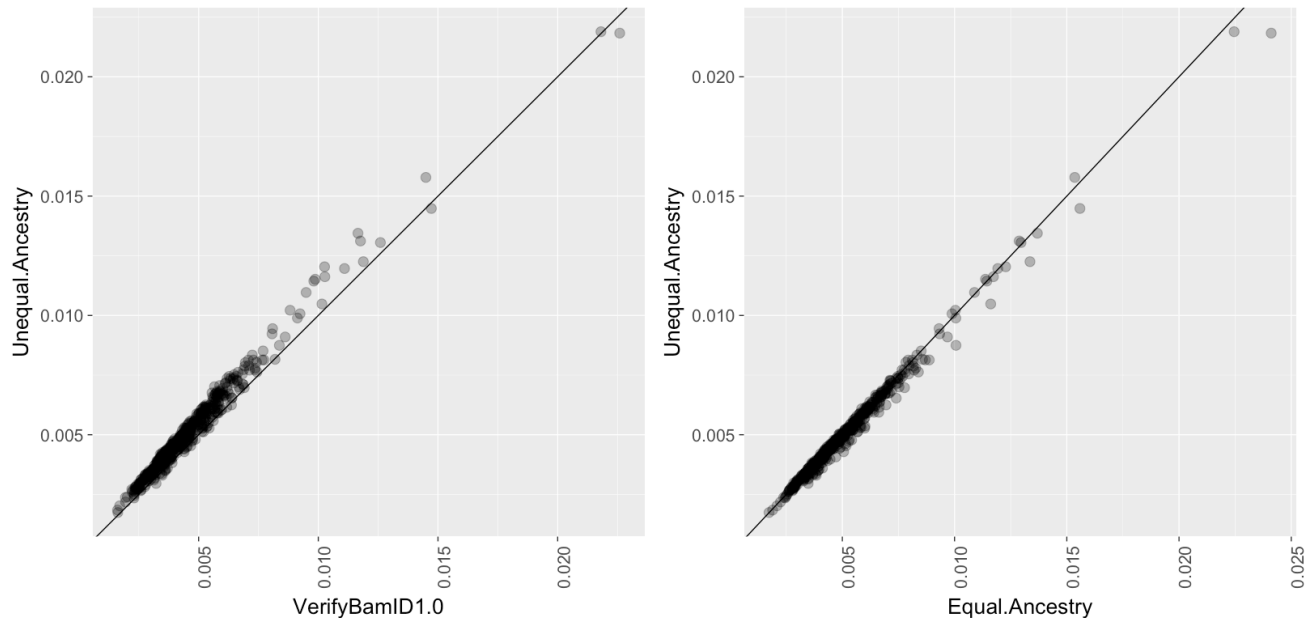

509

510 Figure 4.  
511 Comparison of contamination estimation between using *verifyBamID* and *verifyBamID2* on 500  
512 InPSYght samples. All subjects are African Americans. Each dot represents the pair of contamination  
513 rate estimates using different methods. The left panel shows the estimated contamination rates of  
514 the original *verifyBamID* with pooled allele frequencies, which is the default setting of *verifyBamID*  
515 in x-axis. Y-axis shows *verifyBamID2* with unequal-ancestry model (y-axis). Each point represents a  
516 sequenced subject. The right panel compares the estimated contamination rates between two  
517 models (unequal-ancestry vs. equal-ancestry) of *verifyBamID2* on the same dataset.

518 **Supplementary Materials**

519 **Supplementary Table S1:** Mean estimated contamination rates of *in-silico* contaminated population  
 520 across different intended contamination rate, populations of intended and contaminating samples,  
 521 and the estimation methods.  
 522

| Population |         | Intended % Contam. | Equal-Ancestry (VB2) | Unequal-Ancestry (VB2) | Pooled AF (VB1) | EUR AF (VB1) | EAS AF (VB1) | AFR AF (VB1) |
|------------|---------|--------------------|----------------------|------------------------|-----------------|--------------|--------------|--------------|
| Intended   | Contam. |                    |                      |                        |                 |              |              |              |
| GBR        | GBR     | 1%                 | 1.0%                 | 1.0%                   | 0.8%            | 1.0%         | 0.6%         | 0.5%         |
|            |         | 2%                 | 1.9%                 | 1.9%                   | 1.5%            | 2.0%         | 1.3%         | 1.1%         |
|            |         | 5%                 | 4.6%                 | 4.6%                   | 3.8%            | 4.7%         | 3.2%         | 2.7%         |
|            |         | 10%                | 9.2%                 | 9.2%                   | 7.4%            | 9.4%         | 6.2%         | 5.2%         |
|            |         | 20%                | 18.3%                | 18.3%                  | 14.7%           | 18.5%        | 11.6%        | 9.5%         |
| GBR        | CHS     | 1%                 | 1.1%                 | 1.0%                   | 0.9%            | 1.2%         | 0.7%         | 0.6%         |
|            |         | 2%                 | 2.1%                 | 1.9%                   | 1.7%            | 2.2%         | 1.5%         | 1.2%         |
|            |         | 5%                 | 5.2%                 | 4.7%                   | 4.3%            | 5.3%         | 3.8%         | 3.1%         |
|            |         | 10%                | 10.1%                | 9.4%                   | 8.6%            | 10.4%        | 7.6%         | 5.9%         |
|            |         | 20%                | 19.8%                | 18.7%                  | 17.3%           | 19.9%        | 15.1%        | 10.9%        |
| GBR        | YRI     | 1%                 | 1.3%                 | 1.1%                   | 1.1%            | 1.4%         | 0.8%         | 0.7%         |
|            |         | 2%                 | 2.5%                 | 2.0%                   | 2.1%            | 2.6%         | 1.7%         | 1.4%         |
|            |         | 5%                 | 5.9%                 | 4.8%                   | 5.0%            | 6.1%         | 4.2%         | 3.6%         |
|            |         | 10%                | 11.3%                | 9.5%                   | 10.0%           | 11.7%        | 8.0%         | 7.3%         |
|            |         | 20%                | 21.6%                | 19.1%                  | 19.7%           | 22.0%        | 14.8%        | 14.6%        |
| CHS        | GBR     | 1%                 | 1.2%                 | 0.9%                   | 0.4%            | 0.2%         | 1.2%         | 0.1%         |
|            |         | 2%                 | 2.5%                 | 1.8%                   | 1.1%            | 0.8%         | 2.5%         | 0.5%         |
|            |         | 5%                 | 6.1%                 | 4.8%                   | 3.6%            | 2.9%         | 6.3%         | 2.0%         |
|            |         | 10%                | 12.0%                | 9.9%                   | 7.9%            | 6.6%         | 12.5%        | 4.6%         |
|            |         | 20%                | 23.0%                | 19.8%                  | 16.6%           | 14.2%        | 23.6%        | 9.4%         |
| CHS        | CHS     | 1%                 | 0.9%                 | 0.9%                   | 0.2%            | 0.1%         | 0.9%         | 0.0%         |
|            |         | 2%                 | 1.8%                 | 1.8%                   | 0.7%            | 0.5%         | 1.8%         | 0.2%         |
|            |         | 5%                 | 4.7%                 | 4.8%                   | 2.4%            | 1.9%         | 4.7%         | 1.3%         |
|            |         | 10%                | 9.5%                 | 9.5%                   | 5.2%            | 4.2%         | 9.5%         | 2.9%         |
|            |         | 20%                | 19.1%                | 19.1%                  | 10.6%           | 8.4%         | 18.9%        | 5.9%         |
| CHS        | YRI     | 1%                 | 1.4%                 | 0.9%                   | 0.5%            | 0.3%         | 1.4%         | 0.1%         |
|            |         | 2%                 | 2.8%                 | 1.9%                   | 1.3%            | 1.0%         | 2.8%         | 0.5%         |
|            |         | 5%                 | 6.7%                 | 4.8%                   | 4.1%            | 3.3%         | 6.9%         | 2.3%         |
|            |         | 10%                | 12.9%                | 9.8%                   | 8.9%            | 7.2%         | 13.5%        | 5.4%         |
|            |         | 20%                | 24.3%                | 19.6%                  | 18.6%           | 14.2%        | 24.9%        | 12.2%        |
| YRI        | GBR     | 1%                 | 1.3%                 | 1.0%                   | 0.6%            | 0.4%         | 0.4%         | 1.4%         |



|     |     |     |       |       |       |       |       |       |
|-----|-----|-----|-------|-------|-------|-------|-------|-------|
|     |     | 2%  | 2.5%  | 1.9%  | 1.3%  | 0.9%  | 0.8%  | 2.6%  |
|     |     | 5%  | 6.0%  | 4.6%  | 3.8%  | 2.8%  | 2.6%  | 6.4%  |
|     |     | 10% | 11.5% | 9.3%  | 8.1%  | 6.2%  | 5.6%  | 12.5% |
|     |     | 20% | 21.9% | 18.8% | 16.7% | 13.0% | 11.1% | 23.5% |
| YRI | CHS | 1%  | 1.3%  | 0.9%  | 0.5%  | 0.4%  | 0.3%  | 1.3%  |
|     |     | 2%  | 2.5%  | 1.9%  | 1.3%  | 0.9%  | 0.8%  | 2.6%  |
|     |     | 5%  | 6.0%  | 4.7%  | 3.8%  | 2.8%  | 2.5%  | 6.3%  |
|     |     | 10% | 11.5% | 9.3%  | 7.9%  | 5.9%  | 5.6%  | 12.2% |
|     |     | 20% | 22.0% | 18.8% | 16.6% | 12.0% | 12.1% | 22.9% |
| YRI | YRI | 1%  | 0.9%  | 0.9%  | 0.4%  | 0.2%  | 0.2%  | 0.9%  |
|     |     | 2%  | 1.8%  | 1.8%  | 0.9%  | 0.6%  | 0.5%  | 1.8%  |
|     |     | 5%  | 4.4%  | 4.4%  | 2.4%  | 1.8%  | 1.6%  | 4.4%  |
|     |     | 10% | 8.8%  | 8.8%  | 5.1%  | 3.8%  | 3.4%  | 8.9%  |
|     |     | 20% | 17.6% | 17.6% | 10.1% | 7.3%  | 6.6%  | 17.9% |

523

Equal-Ancestry Model: Estimate from *verifyBamID2* assuming intended and contaminating samples have the same genetic ancestry (in PC coordinates)

Unequal-Ancestry Model: Estimate from *verifyBamID2* allowing intended and contaminating samples to have different genetic ancestry

Pooled AF: Estimate from original *verifyBamID* using allele frequency across all 1000 Genomes phase 3 samples

EUR AF: Estimate from original *verifyBamID* using allele frequency across European subset of 1000 Genomes phase 3 samples

EAS AF: Estimate from original *verifyBamID* using allele frequency across East Asian subset of 1000 Genomes phase 3 samples

AFR AF: Estimate from original *verifyBamID* using allele frequency across African subset of 1000 Genomes phase 3 samples

524

**Supplementary Table S2:** Average of estimated contamination rates across 10 *in-silico* contaminated samples from Mexican population under different models. Results are similar as Europeans, except that unequal-ancestry model slightly reduces estimated contamination rate from equal-ancestry model, unlike GBR.

| Intended % Contamination | Equal-Ancestry (VB2) | Unequal-Ancestry (VB2) | Pooled AF (VB1) | EUR AF (VB1) | EAS AF (VB1) | AFR AF (VB1) |
|--------------------------|----------------------|------------------------|-----------------|--------------|--------------|--------------|
| 1%                       | 1.1%                 | 1.0%                   | 0.8%            | 1.0%         | 0.6%         | 0.3%         |
| 2%                       | 2.1%                 | 2.1%                   | 1.6%            | 2.0%         | 1.4%         | 0.9%         |
| 5%                       | 4.8%                 | 4.8%                   | 3.9%            | 4.6%         | 3.5%         | 2.5%         |
| 10%                      | 9.3%                 | 9.2%                   | 7.8%            | 8.8%         | 6.8%         | 4.9%         |
| 20%                      | 18.5%                | 18.3%                  | 15.4%           | 17.0%        | 13.0%        | 9.4%         |

525

**Supplementary Table S3:** Comparison of mean contamination rate ratio (Estimated/Intended) using different size of marker set (under Unequal-Ancestry Model). The Numbers in parenthesis represent standard deviation.

| Sample Population |         | Marker Set | Intended Contamination Rate |            |            |            |            |
|-------------------|---------|------------|-----------------------------|------------|------------|------------|------------|
| Intended          | Contam. |            | 0.01                        | 0.02       | 0.05       | 0.1        | 0.2        |
| GBR               | GBR     | 1K         | 0.57(0.15)                  | 0.88(0.38) | 0.87(0.28) | 0.92(0.18) | 0.95(0.12) |
|                   |         | 10K        | 0.98(0.13)                  | 0.95(0.11) | 0.93(0.09) | 0.91(0.08) | 0.91(0.07) |
|                   |         | 100K       | 1.00(0.10)                  | 0.96(0.09) | 0.93(0.08) | 0.92(0.06) | 0.91(0.05) |
| CHS               | CHS     | 1K         | 1.38(1.26)                  | 1.09(0.63) | 1.00(0.44) | 0.95(0.41) | 0.95(0.21) |
|                   |         | 10K        | 1.08(0.48)                  | 1.03(0.26) | 1.00(0.12) | 1.01(0.08) | 0.96(0.06) |
|                   |         | 100K       | 0.89(0.12)                  | 0.92(0.08) | 0.95(0.07) | 0.95(0.05) | 0.96(0.04) |
| YRI               | YRI     | 1K         | 1.23(0.86)                  | 0.92(0.46) | 0.98(0.30) | 0.95(0.16) | 0.97(0.10) |
|                   |         | 10K        | 0.91(0.20)                  | 0.87(0.17) | 0.89(0.05) | 0.88(0.04) | 0.90(0.03) |
|                   |         | 100K       | 0.94(0.08)                  | 0.92(0.07) | 0.88(0.04) | 0.88(0.04) | 0.88(0.03) |
| CHS               | YRI     | 1K         | 1.07(0.90)                  | 1.03(0.61) | 0.95(0.37) | 0.97(0.22) | 0.91(0.12) |
|                   |         | 10K        | 1.00(0.46)                  | 0.99(0.22) | 1.02(0.12) | 1.02(0.08) | 0.99(0.06) |
|                   |         | 100K       | 0.88(0.14)                  | 0.93(0.10) | 0.96(0.06) | 0.98(0.05) | 0.98(0.04) |
| YRI               | CHS     | 1K         | 1.00(0.49)                  | 1.00(0.35) | 0.91(0.24) | 1.00(0.17) | 1.01(0.10) |
|                   |         | 10K        | 1.02(0.10)                  | 1.00(0.07) | 0.95(0.03) | 0.94(0.03) | 0.94(0.02) |
|                   |         | 100K       | 0.94(0.15)                  | 0.95(0.09) | 0.93(0.05) | 0.93(0.03) | 0.94(0.03) |
| GBR               | YRI     | 1K         | 1.10(0.49)                  | 1.10(0.28) | 1.06(0.30) | 0.98(0.18) | 0.97(0.09) |
|                   |         | 10K        | 0.94(0.23)                  | 0.98(0.10) | 0.94(0.06) | 0.93(0.04) | 0.94(0.03) |
|                   |         | 100K       | 1.07(0.09)                  | 1.02(0.08) | 0.97(0.06) | 0.95(0.05) | 0.95(0.04) |
| YRI               | GBR     | 1K         | 1.13(0.56)                  | 0.78(0.36) | 0.84(0.19) | 0.93(0.11) | 0.98(0.06) |
|                   |         | 10K        | 0.92(0.24)                  | 0.89(0.15) | 0.91(0.06) | 0.93(0.05) | 0.94(0.05) |
|                   |         | 100K       | 0.95(0.15)                  | 0.93(0.08) | 0.93(0.08) | 0.93(0.06) | 0.94(0.06) |
| CHS               | GBR     | 1K         | 1.28(1.24)                  | 1.12(0.70) | 1.00(0.40) | 0.95(0.21) | 0.97(0.13) |
|                   |         | 10K        | 1.06(0.54)                  | 1.01(0.33) | 1.00(0.14) | 1.00(0.07) | 0.98(0.05) |
|                   |         | 100K       | 0.91(0.06)                  | 0.92(0.07) | 0.97(0.07) | 0.99(0.06) | 0.99(0.05) |
| GBR               | CHS     | 1K         | 0.89(0.47)                  | 0.83(0.42) | 0.84(0.17) | 0.91(0.14) | 0.92(0.13) |
|                   |         | 10K        | 0.97(0.17)                  | 0.93(0.11) | 0.94(0.08) | 0.94(0.06) | 0.92(0.06) |
|                   |         | 100K       | 1.01(0.12)                  | 0.97(0.10) | 0.93(0.08) | 0.94(0.07) | 0.94(0.06) |

527 **Supplementary Table S4.** A full table summarizing the contamination rate ratio (Estimated/Intended) across vari-  
 528 ous simulation parameters, populations, and estimation methods shown in Figure 3. 100K marker sets were used.

| Sample Population |         | Method | Allele Frequencies      | Intended % Contam | Mean | SD   | MSE   |
|-------------------|---------|--------|-------------------------|-------------------|------|------|-------|
| In-tended         | Contam. |        |                         |                   |      |      |       |
| GBR               | GBR     | VB1    | AFR                     | 1%                | 0.52 | 0.11 | 0.242 |
| GBR               | GBR     | VB1    | AFR                     | 2%                | 0.53 | 0.09 | 0.223 |
| GBR               | GBR     | VB1    | AFR                     | 5%                | 0.53 | 0.06 | 0.221 |
| GBR               | GBR     | VB1    | AFR                     | 10%               | 0.52 | 0.05 | 0.237 |
| GBR               | GBR     | VB1    | AFR                     | 20%               | 0.48 | 0.04 | 0.276 |
| GBR               | GBR     | VB1    | EUR                     | 1%                | 1.04 | 0.10 | 0.012 |
| GBR               | GBR     | VB1    | EUR                     | 2%                | 0.98 | 0.09 | 0.007 |
| GBR               | GBR     | VB1    | EUR                     | 5%                | 0.95 | 0.07 | 0.008 |
| GBR               | GBR     | VB1    | EUR                     | 10%               | 0.94 | 0.06 | 0.008 |
| GBR               | GBR     | VB1    | EUR                     | 20%               | 0.92 | 0.05 | 0.008 |
| GBR               | GBR     | VB1    | EAS                     | 1%                | 0.65 | 0.11 | 0.136 |
| GBR               | GBR     | VB1    | EAS                     | 2%                | 0.65 | 0.09 | 0.132 |
| GBR               | GBR     | VB1    | EAS                     | 5%                | 0.64 | 0.06 | 0.135 |
| GBR               | GBR     | VB1    | EAS                     | 10%               | 0.62 | 0.05 | 0.148 |
| GBR               | GBR     | VB1    | EAS                     | 20%               | 0.58 | 0.05 | 0.179 |
| GBR               | GBR     | VB1    | Pooled                  | 1%                | 0.79 | 0.11 | 0.055 |
| GBR               | GBR     | VB1    | Pooled                  | 2%                | 0.77 | 0.08 | 0.060 |
| GBR               | GBR     | VB1    | Pooled                  | 5%                | 0.75 | 0.07 | 0.066 |
| GBR               | GBR     | VB1    | Pooled                  | 10%               | 0.74 | 0.06 | 0.069 |
| GBR               | GBR     | VB1    | Pooled                  | 20%               | 0.73 | 0.05 | 0.073 |
| GBR               | GBR     | VB2    | ISAF (Equal-Ancestry)   | 1%                | 1.02 | 0.11 | 0.010 |
| GBR               | GBR     | VB2    | ISAF (Equal-Ancestry)   | 2%                | 0.96 | 0.09 | 0.009 |
| GBR               | GBR     | VB2    | ISAF (Equal -Ancestry)  | 5%                | 0.93 | 0.07 | 0.010 |
| GBR               | GBR     | VB2    | ISAF (Equal -Ancestry)  | 10%               | 0.92 | 0.06 | 0.010 |
| GBR               | GBR     | VB2    | ISAF (Equal -Ancestry)  | 20%               | 0.91 | 0.05 | 0.010 |
| GBR               | GBR     | VB2    | ISAF (Unequal-Ancestry) | 1%                | 1.00 | 0.10 | 0.009 |
| GBR               | GBR     | VB2    | ISAF (Unequal-Ancestry) | 2%                | 0.96 | 0.09 | 0.009 |
| GBR               | GBR     | VB2    | ISAF (Unequal-Ancestry) | 5%                | 0.93 | 0.08 | 0.011 |
| GBR               | GBR     | VB2    | ISAF (Unequal-Ancestry) | 10%               | 0.92 | 0.06 | 0.010 |
| GBR               | GBR     | VB2    | ISAF (Unequal-Ancestry) | 20%               | 0.91 | 0.05 | 0.010 |
| GBR               | CHS     | VB1    | AFR                     | 1%                | 0.59 | 0.08 | 0.172 |
| GBR               | CHS     | VB1    | AFR                     | 2%                | 0.60 | 0.06 | 0.162 |
| GBR               | CHS     | VB1    | AFR                     | 5%                | 0.61 | 0.05 | 0.154 |
| GBR               | CHS     | VB1    | AFR                     | 10%               | 0.59 | 0.04 | 0.169 |
| GBR               | CHS     | VB1    | AFR                     | 20%               | 0.55 | 0.03 | 0.206 |

|     |     |     |                         |     |      |      |       |
|-----|-----|-----|-------------------------|-----|------|------|-------|
| GBR | CHS | VB1 | EUR                     | 1%  | 1.17 | 0.11 | 0.039 |
| GBR | CHS | VB1 | EUR                     | 2%  | 1.09 | 0.10 | 0.016 |
| GBR | CHS | VB1 | EUR                     | 5%  | 1.06 | 0.08 | 0.010 |
| GBR | CHS | VB1 | EUR                     | 10% | 1.04 | 0.07 | 0.006 |
| GBR | CHS | VB1 | EUR                     | 20% | 0.99 | 0.06 | 0.003 |
| GBR | CHS | VB1 | EAS                     | 1%  | 0.74 | 0.09 | 0.074 |
| GBR | CHS | VB1 | EAS                     | 2%  | 0.74 | 0.07 | 0.072 |
| GBR | CHS | VB1 | EAS                     | 5%  | 0.76 | 0.06 | 0.063 |
| GBR | CHS | VB1 | EAS                     | 10% | 0.76 | 0.05 | 0.061 |
| GBR | CHS | VB1 | EAS                     | 20% | 0.75 | 0.04 | 0.062 |
| GBR | CHS | VB1 | Pooled                  | 1%  | 0.89 | 0.09 | 0.019 |
| GBR | CHS | VB1 | Pooled                  | 2%  | 0.86 | 0.07 | 0.025 |
| GBR | CHS | VB1 | Pooled                  | 5%  | 0.86 | 0.06 | 0.022 |
| GBR | CHS | VB1 | Pooled                  | 10% | 0.86 | 0.06 | 0.022 |
| GBR | CHS | VB1 | Pooled                  | 20% | 0.86 | 0.05 | 0.021 |
| GBR | CHS | VB2 | ISAF (Equal-Ancestry)   | 1%  | 1.13 | 0.11 | 0.028 |
| GBR | CHS | VB2 | ISAF (Equal-Ancestry)   | 2%  | 1.06 | 0.09 | 0.011 |
| GBR | CHS | VB2 | ISAF (Equal -Ancestry)  | 5%  | 1.03 | 0.08 | 0.007 |
| GBR | CHS | VB2 | ISAF (Equal -Ancestry)  | 10% | 1.01 | 0.07 | 0.004 |
| GBR | CHS | VB2 | ISAF (Equal -Ancestry)  | 20% | 0.99 | 0.06 | 0.004 |
| GBR | CHS | VB2 | ISAF (Unequal-Ancestry) | 1%  | 1.01 | 0.12 | 0.012 |
| GBR | CHS | VB2 | ISAF (Unequal-Ancestry) | 2%  | 0.97 | 0.10 | 0.010 |
| GBR | CHS | VB2 | ISAF (Unequal-Ancestry) | 5%  | 0.93 | 0.08 | 0.010 |
| GBR | CHS | VB2 | ISAF (Unequal-Ancestry) | 10% | 0.94 | 0.07 | 0.008 |
| GBR | CHS | VB2 | ISAF (Unequal-Ancestry) | 20% | 0.94 | 0.06 | 0.007 |
| GBR | YRI | VB1 | AFR                     | 1%  | 0.67 | 0.11 | 0.119 |
| GBR | YRI | VB1 | AFR                     | 2%  | 0.70 | 0.09 | 0.096 |
| GBR | YRI | VB1 | AFR                     | 5%  | 0.72 | 0.06 | 0.082 |
| GBR | YRI | VB1 | AFR                     | 10% | 0.73 | 0.05 | 0.077 |
| GBR | YRI | VB1 | AFR                     | 20% | 0.73 | 0.04 | 0.074 |
| GBR | YRI | VB1 | EUR                     | 1%  | 1.38 | 0.10 | 0.150 |
| GBR | YRI | VB1 | EUR                     | 2%  | 1.30 | 0.09 | 0.097 |
| GBR | YRI | VB1 | EUR                     | 5%  | 1.23 | 0.07 | 0.055 |
| GBR | YRI | VB1 | EUR                     | 10% | 1.17 | 0.05 | 0.032 |
| GBR | YRI | VB1 | EUR                     | 20% | 1.10 | 0.04 | 0.011 |
| GBR | YRI | VB1 | EAS                     | 1%  | 0.85 | 0.10 | 0.032 |
| GBR | YRI | VB1 | EAS                     | 2%  | 0.85 | 0.08 | 0.028 |
| GBR | YRI | VB1 | EAS                     | 5%  | 0.83 | 0.06 | 0.031 |
| GBR | YRI | VB1 | EAS                     | 10% | 0.80 | 0.04 | 0.042 |
| GBR | YRI | VB1 | EAS                     | 20% | 0.74 | 0.03 | 0.069 |

|     |     |     |                         |     |      |      |       |
|-----|-----|-----|-------------------------|-----|------|------|-------|
| GBR | YRI | VB1 | Pooled                  | 1%  | 1.05 | 0.09 | 0.010 |
| GBR | YRI | VB1 | Pooled                  | 2%  | 1.03 | 0.08 | 0.007 |
| GBR | YRI | VB1 | Pooled                  | 5%  | 1.01 | 0.06 | 0.003 |
| GBR | YRI | VB1 | Pooled                  | 10% | 1.00 | 0.05 | 0.002 |
| GBR | YRI | VB1 | Pooled                  | 20% | 0.99 | 0.04 | 0.002 |
| GBR | YRI | VB2 | ISAF (Equal-Ancestry)   | 1%  | 1.33 | 0.09 | 0.118 |
| GBR | YRI | VB2 | ISAF (Equal-Ancestry)   | 2%  | 1.26 | 0.09 | 0.074 |
| GBR | YRI | VB2 | ISAF (Equal -Ancestry)  | 5%  | 1.18 | 0.06 | 0.036 |
| GBR | YRI | VB2 | ISAF (Equal -Ancestry)  | 10% | 1.13 | 0.05 | 0.018 |
| GBR | YRI | VB2 | ISAF (Equal -Ancestry)  | 20% | 1.08 | 0.04 | 0.008 |
| GBR | YRI | VB2 | ISAF (Unequal-Ancestry) | 1%  | 1.07 | 0.09 | 0.014 |
| GBR | YRI | VB2 | ISAF (Unequal-Ancestry) | 2%  | 1.02 | 0.08 | 0.006 |
| GBR | YRI | VB2 | ISAF (Unequal-Ancestry) | 5%  | 0.97 | 0.06 | 0.004 |
| GBR | YRI | VB2 | ISAF (Unequal-Ancestry) | 10% | 0.95 | 0.05 | 0.004 |
| GBR | YRI | VB2 | ISAF (Unequal-Ancestry) | 20% | 0.95 | 0.04 | 0.004 |
| CHS | GBR | VB1 | AFR                     | 1%  | 0.07 | 0.04 | 0.868 |
| CHS | GBR | VB1 | AFR                     | 2%  | 0.23 | 0.05 | 0.597 |
| CHS | GBR | VB1 | AFR                     | 5%  | 0.40 | 0.04 | 0.366 |
| CHS | GBR | VB1 | AFR                     | 10% | 0.46 | 0.03 | 0.290 |
| CHS | GBR | VB1 | AFR                     | 20% | 0.47 | 0.02 | 0.282 |
| CHS | GBR | VB1 | EUR                     | 1%  | 0.21 | 0.05 | 0.625 |
| CHS | GBR | VB1 | EUR                     | 2%  | 0.40 | 0.05 | 0.364 |
| CHS | GBR | VB1 | EUR                     | 5%  | 0.57 | 0.05 | 0.184 |
| CHS | GBR | VB1 | EUR                     | 10% | 0.66 | 0.04 | 0.119 |
| CHS | GBR | VB1 | EUR                     | 20% | 0.71 | 0.04 | 0.087 |
| CHS | GBR | VB1 | EAS                     | 1%  | 1.24 | 0.11 | 0.069 |
| CHS | GBR | VB1 | EAS                     | 2%  | 1.26 | 0.10 | 0.075 |
| CHS | GBR | VB1 | EAS                     | 5%  | 1.27 | 0.08 | 0.077 |
| CHS | GBR | VB1 | EAS                     | 10% | 1.25 | 0.06 | 0.066 |
| CHS | GBR | VB1 | EAS                     | 20% | 1.18 | 0.05 | 0.035 |
| CHS | GBR | VB1 | Pooled                  | 1%  | 0.36 | 0.06 | 0.409 |
| CHS | GBR | VB1 | Pooled                  | 2%  | 0.55 | 0.06 | 0.207 |
| CHS | GBR | VB1 | Pooled                  | 5%  | 0.71 | 0.05 | 0.086 |
| CHS | GBR | VB1 | Pooled                  | 10% | 0.79 | 0.05 | 0.047 |
| CHS | GBR | VB1 | Pooled                  | 20% | 0.83 | 0.04 | 0.031 |
| CHS | GBR | VB2 | ISAF (Equal-Ancestry)   | 1%  | 1.22 | 0.11 | 0.060 |
| CHS | GBR | VB2 | ISAF (Equal-Ancestry)   | 2%  | 1.23 | 0.10 | 0.060 |
| CHS | GBR | VB2 | ISAF (Equal -Ancestry)  | 5%  | 1.23 | 0.08 | 0.057 |
| CHS | GBR | VB2 | ISAF (Equal -Ancestry)  | 10% | 1.20 | 0.06 | 0.044 |
| CHS | GBR | VB2 | ISAF (Equal -Ancestry)  | 20% | 1.15 | 0.05 | 0.025 |

|     |     |     |                         |     |      |      |       |
|-----|-----|-----|-------------------------|-----|------|------|-------|
| CHS | GBR | VB2 | ISAF (Unequal-Ancestry) | 1%  | 0.91 | 0.06 | 0.011 |
| CHS | GBR | VB2 | ISAF (Unequal-Ancestry) | 2%  | 0.92 | 0.07 | 0.010 |
| CHS | GBR | VB2 | ISAF (Unequal-Ancestry) | 5%  | 0.97 | 0.07 | 0.005 |
| CHS | GBR | VB2 | ISAF (Unequal-Ancestry) | 10% | 0.99 | 0.06 | 0.004 |
| CHS | GBR | VB2 | ISAF (Unequal-Ancestry) | 20% | 0.99 | 0.05 | 0.003 |
| CHS | CHS | VB1 | AFR                     | 1%  | 0.02 | 0.03 | 0.956 |
| CHS | CHS | VB1 | AFR                     | 2%  | 0.12 | 0.05 | 0.782 |
| CHS | CHS | VB1 | AFR                     | 5%  | 0.25 | 0.03 | 0.562 |
| CHS | CHS | VB1 | AFR                     | 10% | 0.29 | 0.02 | 0.500 |
| CHS | CHS | VB1 | AFR                     | 20% | 0.29 | 0.01 | 0.500 |
| CHS | CHS | VB1 | EUR                     | 1%  | 0.10 | 0.07 | 0.815 |
| CHS | CHS | VB1 | EUR                     | 2%  | 0.24 | 0.05 | 0.573 |
| CHS | CHS | VB1 | EUR                     | 5%  | 0.38 | 0.03 | 0.385 |
| CHS | CHS | VB1 | EUR                     | 10% | 0.42 | 0.02 | 0.338 |
| CHS | CHS | VB1 | EUR                     | 20% | 0.42 | 0.02 | 0.337 |
| CHS | CHS | VB1 | EAS                     | 1%  | 0.90 | 0.10 | 0.020 |
| CHS | CHS | VB1 | EAS                     | 2%  | 0.92 | 0.07 | 0.011 |
| CHS | CHS | VB1 | EAS                     | 5%  | 0.95 | 0.06 | 0.006 |
| CHS | CHS | VB1 | EAS                     | 10% | 0.95 | 0.04 | 0.004 |
| CHS | CHS | VB1 | EAS                     | 20% | 0.94 | 0.03 | 0.004 |
| CHS | CHS | VB1 | Pooled                  | 1%  | 0.19 | 0.08 | 0.659 |
| CHS | CHS | VB1 | Pooled                  | 2%  | 0.34 | 0.05 | 0.435 |
| CHS | CHS | VB1 | Pooled                  | 5%  | 0.48 | 0.04 | 0.275 |
| CHS | CHS | VB1 | Pooled                  | 10% | 0.52 | 0.03 | 0.233 |
| CHS | CHS | VB1 | Pooled                  | 20% | 0.53 | 0.02 | 0.222 |
| CHS | CHS | VB2 | ISAF (Equal-Ancestry)   | 1%  | 0.90 | 0.11 | 0.021 |
| CHS | CHS | VB2 | ISAF (Equal-Ancestry)   | 2%  | 0.91 | 0.07 | 0.012 |
| CHS | CHS | VB2 | ISAF (Equal -Ancestry)  | 5%  | 0.95 | 0.06 | 0.006 |
| CHS | CHS | VB2 | ISAF (Equal -Ancestry)  | 10% | 0.95 | 0.04 | 0.004 |
| CHS | CHS | VB2 | ISAF (Equal -Ancestry)  | 20% | 0.95 | 0.03 | 0.003 |
| CHS | CHS | VB2 | ISAF (Unequal-Ancestry) | 1%  | 0.89 | 0.12 | 0.024 |
| CHS | CHS | VB2 | ISAF (Unequal-Ancestry) | 2%  | 0.92 | 0.08 | 0.012 |
| CHS | CHS | VB2 | ISAF (Unequal-Ancestry) | 5%  | 0.95 | 0.07 | 0.006 |
| CHS | CHS | VB2 | ISAF (Unequal-Ancestry) | 10% | 0.95 | 0.05 | 0.004 |
| CHS | CHS | VB2 | ISAF (Unequal-Ancestry) | 20% | 0.96 | 0.04 | 0.003 |
| CHS | YRI | VB1 | AFR                     | 1%  | 0.09 | 0.09 | 0.828 |
| CHS | YRI | VB1 | AFR                     | 2%  | 0.27 | 0.08 | 0.543 |
| CHS | YRI | VB1 | AFR                     | 5%  | 0.45 | 0.05 | 0.302 |
| CHS | YRI | VB1 | AFR                     | 10% | 0.54 | 0.04 | 0.210 |
| CHS | YRI | VB1 | AFR                     | 20% | 0.61 | 0.03 | 0.155 |

|     |     |     |                         |     |      |      |       |
|-----|-----|-----|-------------------------|-----|------|------|-------|
| CHS | YRI | VB1 | EUR                     | 1%  | 0.31 | 0.11 | 0.492 |
| CHS | YRI | VB1 | EUR                     | 2%  | 0.51 | 0.08 | 0.250 |
| CHS | YRI | VB1 | EUR                     | 5%  | 0.67 | 0.05 | 0.114 |
| CHS | YRI | VB1 | EUR                     | 10% | 0.72 | 0.04 | 0.083 |
| CHS | YRI | VB1 | EUR                     | 20% | 0.71 | 0.03 | 0.084 |
| CHS | YRI | VB1 | EAS                     | 1%  | 1.38 | 0.14 | 0.161 |
| CHS | YRI | VB1 | EAS                     | 2%  | 1.39 | 0.10 | 0.163 |
| CHS | YRI | VB1 | EAS                     | 5%  | 1.38 | 0.07 | 0.151 |
| CHS | YRI | VB1 | EAS                     | 10% | 1.35 | 0.06 | 0.123 |
| CHS | YRI | VB1 | EAS                     | 20% | 1.24 | 0.04 | 0.061 |
| CHS | YRI | VB1 | Pooled                  | 1%  | 0.47 | 0.13 | 0.298 |
| CHS | YRI | VB1 | Pooled                  | 2%  | 0.66 | 0.09 | 0.123 |
| CHS | YRI | VB1 | Pooled                  | 5%  | 0.82 | 0.06 | 0.036 |
| CHS | YRI | VB1 | Pooled                  | 10% | 0.89 | 0.05 | 0.015 |
| CHS | YRI | VB1 | Pooled                  | 20% | 0.93 | 0.04 | 0.007 |
| CHS | YRI | VB2 | ISAF (Equal-Ancestry)   | 1%  | 1.37 | 0.14 | 0.157 |
| CHS | YRI | VB2 | ISAF (Equal-Ancestry)   | 2%  | 1.38 | 0.11 | 0.154 |
| CHS | YRI | VB2 | ISAF (Equal -Ancestry)  | 5%  | 1.34 | 0.07 | 0.122 |
| CHS | YRI | VB2 | ISAF (Equal -Ancestry)  | 10% | 1.29 | 0.06 | 0.085 |
| CHS | YRI | VB2 | ISAF (Equal -Ancestry)  | 20% | 1.22 | 0.05 | 0.048 |
| CHS | YRI | VB2 | ISAF (Unequal-Ancestry) | 1%  | 0.88 | 0.14 | 0.033 |
| CHS | YRI | VB2 | ISAF (Unequal-Ancestry) | 2%  | 0.93 | 0.10 | 0.014 |
| CHS | YRI | VB2 | ISAF (Unequal-Ancestry) | 5%  | 0.96 | 0.06 | 0.005 |
| CHS | YRI | VB2 | ISAF (Unequal-Ancestry) | 10% | 0.98 | 0.05 | 0.002 |
| CHS | YRI | VB2 | ISAF (Unequal-Ancestry) | 20% | 0.98 | 0.04 | 0.002 |
| YRI | GBR | VB1 | AFR                     | 1%  | 1.43 | 0.23 | 0.236 |
| YRI | GBR | VB1 | AFR                     | 2%  | 1.31 | 0.14 | 0.113 |
| YRI | GBR | VB1 | AFR                     | 5%  | 1.28 | 0.08 | 0.081 |
| YRI | GBR | VB1 | AFR                     | 10% | 1.25 | 0.07 | 0.065 |
| YRI | GBR | VB1 | AFR                     | 20% | 1.17 | 0.06 | 0.034 |
| YRI | GBR | VB1 | EUR                     | 1%  | 0.36 | 0.22 | 0.453 |
| YRI | GBR | VB1 | EUR                     | 2%  | 0.46 | 0.19 | 0.329 |
| YRI | GBR | VB1 | EUR                     | 5%  | 0.56 | 0.11 | 0.201 |
| YRI | GBR | VB1 | EUR                     | 10% | 0.62 | 0.07 | 0.153 |
| YRI | GBR | VB1 | EUR                     | 20% | 0.65 | 0.05 | 0.124 |
| YRI | GBR | VB1 | EAS                     | 1%  | 0.32 | 0.20 | 0.504 |
| YRI | GBR | VB1 | EAS                     | 2%  | 0.41 | 0.18 | 0.380 |
| YRI | GBR | VB1 | EAS                     | 5%  | 0.52 | 0.11 | 0.245 |
| YRI | GBR | VB1 | EAS                     | 10% | 0.55 | 0.07 | 0.204 |
| YRI | GBR | VB1 | EAS                     | 20% | 0.56 | 0.04 | 0.198 |



|     |     |     |                         |     |      |      |       |
|-----|-----|-----|-------------------------|-----|------|------|-------|
| YRI | GBR | VB1 | Pooled                  | 1%  | 0.57 | 0.26 | 0.248 |
| YRI | GBR | VB1 | Pooled                  | 2%  | 0.67 | 0.17 | 0.138 |
| YRI | GBR | VB1 | Pooled                  | 5%  | 0.76 | 0.10 | 0.066 |
| YRI | GBR | VB1 | Pooled                  | 10% | 0.80 | 0.07 | 0.043 |
| YRI | GBR | VB1 | Pooled                  | 20% | 0.83 | 0.05 | 0.030 |
| YRI | GBR | VB2 | ISAF (Equal-Ancestry)   | 1%  | 1.30 | 0.15 | 0.107 |
| YRI | GBR | VB2 | ISAF (Equal-Ancestry)   | 2%  | 1.25 | 0.11 | 0.072 |
| YRI | GBR | VB2 | ISAF (Equal -Ancestry)  | 5%  | 1.20 | 0.09 | 0.048 |
| YRI | GBR | VB2 | ISAF (Equal -Ancestry)  | 10% | 1.15 | 0.07 | 0.028 |
| YRI | GBR | VB2 | ISAF (Equal -Ancestry)  | 20% | 1.10 | 0.07 | 0.013 |
| YRI | GBR | VB2 | ISAF (Unequal-Ancestry) | 1%  | 0.95 | 0.15 | 0.021 |
| YRI | GBR | VB2 | ISAF (Unequal-Ancestry) | 2%  | 0.93 | 0.08 | 0.012 |
| YRI | GBR | VB2 | ISAF (Unequal-Ancestry) | 5%  | 0.93 | 0.08 | 0.011 |
| YRI | GBR | VB2 | ISAF (Unequal-Ancestry) | 10% | 0.93 | 0.06 | 0.008 |
| YRI | GBR | VB2 | ISAF (Unequal-Ancestry) | 20% | 0.94 | 0.06 | 0.006 |
| YRI | CHS | VB1 | AFR                     | 1%  | 1.32 | 0.13 | 0.120 |
| YRI | CHS | VB1 | AFR                     | 2%  | 1.30 | 0.11 | 0.098 |
| YRI | CHS | VB1 | AFR                     | 5%  | 1.26 | 0.07 | 0.071 |
| YRI | CHS | VB1 | AFR                     | 10% | 1.22 | 0.05 | 0.049 |
| YRI | CHS | VB1 | AFR                     | 20% | 1.14 | 0.04 | 0.022 |
| YRI | CHS | VB1 | EUR                     | 1%  | 0.35 | 0.20 | 0.455 |
| YRI | CHS | VB1 | EUR                     | 2%  | 0.46 | 0.18 | 0.319 |
| YRI | CHS | VB1 | EUR                     | 5%  | 0.56 | 0.10 | 0.204 |
| YRI | CHS | VB1 | EUR                     | 10% | 0.59 | 0.06 | 0.168 |
| YRI | CHS | VB1 | EUR                     | 20% | 0.60 | 0.03 | 0.159 |
| YRI | CHS | VB1 | EAS                     | 1%  | 0.29 | 0.17 | 0.528 |
| YRI | CHS | VB1 | EAS                     | 2%  | 0.40 | 0.18 | 0.395 |
| YRI | CHS | VB1 | EAS                     | 5%  | 0.51 | 0.11 | 0.252 |
| YRI | CHS | VB1 | EAS                     | 10% | 0.56 | 0.06 | 0.194 |
| YRI | CHS | VB1 | EAS                     | 20% | 0.61 | 0.03 | 0.157 |
| YRI | CHS | VB1 | Pooled                  | 1%  | 0.55 | 0.24 | 0.259 |
| YRI | CHS | VB1 | Pooled                  | 2%  | 0.66 | 0.16 | 0.136 |
| YRI | CHS | VB1 | Pooled                  | 5%  | 0.75 | 0.09 | 0.068 |
| YRI | CHS | VB1 | Pooled                  | 10% | 0.79 | 0.04 | 0.044 |
| YRI | CHS | VB1 | Pooled                  | 20% | 0.83 | 0.02 | 0.030 |
| YRI | CHS | VB2 | ISAF (Equal-Ancestry)   | 1%  | 1.29 | 0.13 | 0.098 |
| YRI | CHS | VB2 | ISAF (Equal-Ancestry)   | 2%  | 1.25 | 0.11 | 0.074 |
| YRI | CHS | VB2 | ISAF (Equal -Ancestry)  | 5%  | 1.20 | 0.07 | 0.043 |
| YRI | CHS | VB2 | ISAF (Equal -Ancestry)  | 10% | 1.15 | 0.04 | 0.023 |
| YRI | CHS | VB2 | ISAF (Equal -Ancestry)  | 20% | 1.10 | 0.04 | 0.011 |

|     |     |     |                         |     |      |      |       |
|-----|-----|-----|-------------------------|-----|------|------|-------|
| YRI | CHS | VB2 | ISAF (Unequal-Ancestry) | 1%  | 0.94 | 0.15 | 0.023 |
| YRI | CHS | VB2 | ISAF (Unequal-Ancestry) | 2%  | 0.95 | 0.09 | 0.010 |
| YRI | CHS | VB2 | ISAF (Unequal-Ancestry) | 5%  | 0.93 | 0.05 | 0.007 |
| YRI | CHS | VB2 | ISAF (Unequal-Ancestry) | 10% | 0.93 | 0.03 | 0.005 |
| YRI | CHS | VB2 | ISAF (Unequal-Ancestry) | 20% | 0.94 | 0.03 | 0.004 |
| YRI | YRI | VB1 | AFR                     | 1%  | 0.95 | 0.09 | 0.010 |
| YRI | YRI | VB1 | AFR                     | 2%  | 0.92 | 0.06 | 0.009 |
| YRI | YRI | VB1 | AFR                     | 5%  | 0.89 | 0.05 | 0.014 |
| YRI | YRI | VB1 | AFR                     | 10% | 0.89 | 0.04 | 0.013 |
| YRI | YRI | VB1 | AFR                     | 20% | 0.89 | 0.03 | 0.012 |
| YRI | YRI | VB1 | EUR                     | 1%  | 0.22 | 0.13 | 0.619 |
| YRI | YRI | VB1 | EUR                     | 2%  | 0.29 | 0.14 | 0.518 |
| YRI | YRI | VB1 | EUR                     | 5%  | 0.36 | 0.09 | 0.423 |
| YRI | YRI | VB1 | EUR                     | 10% | 0.38 | 0.06 | 0.391 |
| YRI | YRI | VB1 | EUR                     | 20% | 0.36 | 0.03 | 0.405 |
| YRI | YRI | VB1 | EAS                     | 1%  | 0.18 | 0.11 | 0.680 |
| YRI | YRI | VB1 | EAS                     | 2%  | 0.25 | 0.13 | 0.575 |
| YRI | YRI | VB1 | EAS                     | 5%  | 0.32 | 0.09 | 0.474 |
| YRI | YRI | VB1 | EAS                     | 10% | 0.34 | 0.06 | 0.438 |
| YRI | YRI | VB1 | EAS                     | 20% | 0.33 | 0.03 | 0.452 |
| YRI | YRI | VB1 | Pooled                  | 1%  | 0.36 | 0.18 | 0.433 |
| YRI | YRI | VB1 | Pooled                  | 2%  | 0.44 | 0.14 | 0.333 |
| YRI | YRI | VB1 | Pooled                  | 5%  | 0.49 | 0.08 | 0.267 |
| YRI | YRI | VB1 | Pooled                  | 10% | 0.51 | 0.05 | 0.242 |
| YRI | YRI | VB1 | Pooled                  | 20% | 0.51 | 0.03 | 0.245 |
| YRI | YRI | VB2 | ISAF (Equal-Ancestry)   | 1%  | 0.94 | 0.10 | 0.012 |
| YRI | YRI | VB2 | ISAF (Equal-Ancestry)   | 2%  | 0.92 | 0.06 | 0.011 |
| YRI | YRI | VB2 | ISAF (Equal -Ancestry)  | 5%  | 0.88 | 0.04 | 0.016 |
| YRI | YRI | VB2 | ISAF (Equal -Ancestry)  | 10% | 0.88 | 0.04 | 0.015 |
| YRI | YRI | VB2 | ISAF (Equal -Ancestry)  | 20% | 0.88 | 0.03 | 0.015 |
| YRI | YRI | VB2 | ISAF (Unequal-Ancestry) | 1%  | 0.94 | 0.08 | 0.010 |
| YRI | YRI | VB2 | ISAF (Unequal-Ancestry) | 2%  | 0.92 | 0.07 | 0.011 |
| YRI | YRI | VB2 | ISAF (Unequal-Ancestry) | 5%  | 0.88 | 0.04 | 0.016 |
| YRI | YRI | VB2 | ISAF (Unequal-Ancestry) | 10% | 0.88 | 0.04 | 0.015 |
| YRI | YRI | VB2 | ISAF (Unequal-Ancestry) | 20% | 0.88 | 0.03 | 0.015 |
